# 1 **How a Formate Dehydrogenase Responds to Oxygen:** 2 **Unexpected O<sub>2</sub> Insensitivity of an Enzyme Harboring** 3 **Tungstopterin, Selenocysteine, and [4Fe-4S] Clusters**

4  
5 Joel E. Graham,<sup>‡</sup> Dimitri Niks,<sup>¶</sup> Grant M. Zane,<sup>†</sup> Qin Gui,<sup>†</sup> Kellie Hom,<sup>‡</sup> Russ Hille,<sup>¶</sup> Judy D.  
6 Wall,<sup>†</sup> and C. S. Raman<sup>‡\*</sup>

7  
8 <sup>‡</sup>Department of Pharmaceutical Sciences, University of Maryland, Baltimore, MD 21201,  
9 USA; <sup>¶</sup>Department of Biochemistry, University of California, Riverside, CA 92521;  
10 <sup>†</sup>Department of Biochemistry, University of Missouri, Columbia, MO 65211, USA.

11  
12  
13 **KEYWORDS** Oxygen-insensitive metal-dependent formate dehydrogenase, Formate  
14 oxidase, Tungsten, Pterin, Selenium, Iron-sulfur cluster, Electron Paramagnetic Resonance,  
15 <sup>13</sup>C NMR, Oximetry, Hydrogen peroxide, Electron bifurcation, Sulfate-reducing bacteria,  
16 *Desulfovibrio vulgaris* Hildenborough.

17  
18

## 1 **ABSTRACT**

2 The reversible two-electron interconversion of formate and CO<sub>2</sub> is catalyzed by both non-  
3 metallo and metallo-formate dehydrogenases (FDHs). The latter group comprises  
4 molybdenum- or tungsten-containing enzymes with the metal coordinated by two  
5 equivalents of a pyranopterin cofactor, a cysteinyl or selenocysteinyl ligand supplied by  
6 the polypeptide, and a catalytically essential terminal sulfido ligand. In addition, these  
7 biocatalysts incorporate one or more [4Fe-4S] clusters for facilitating long-distance  
8 electron transfer. But an interesting dichotomy arises when attempting to understand how  
9 the metallo-FDHs react with O<sub>2</sub>. Whereas existing scholarship portrays these enzymes as  
10 being unable to perform in air due to extreme O<sub>2</sub> lability of their metal centers, studies  
11 dating as far back as the 1930s emphasize that some of these systems exhibit formate  
12 oxidase (FOX) activity, coupling formate oxidation to O<sub>2</sub> reduction. Therefore, to reconcile  
13 these conflicting views, we explored context-dependent functional linkages between  
14 metallo-FDHs and their cognate electron acceptors within the same organism vis-à-vis  
15 catalysis under atmospheric conditions. Here, we report the discovery and  
16 characterization of an O<sub>2</sub>-insensitive FDH2 from the sulfate-reducing bacterium  
17 *Desulfovibrio vulgaris* Hildenborough that ligates tungsten, selenocysteine, and four [4Fe-  
18 4S] clusters. Notably, we advance a robust expression platform for its recombinant  
19 production, eliminating both the requirement of nitrate or azide during purification and  
20 reductive activation with thiols and/or formate prior to catalysis. Because the distinctive  
21 spectral signatures of formate-reduced DvH-FDH2 remain invariant under anaerobic and  
22 aerobic conditions, we benchmarked the enzyme activity in air, identifying CO<sub>2</sub> as the  
23 bona fide product of catalysis. Full reaction progress curve analysis uncovers a high  
24 catalytic efficiency when probed with an artificial electron acceptor pair. Furthermore, we  
25 show that DvH-FDH2 enables hydrogen peroxide production sans superoxide release to

1 achieve O<sub>2</sub> insensitivity. Direct electron transfer to cytochrome *c* in air also reveals that  
2 electron bifurcation is operational in this system. Taken together, our work  
3 unambiguously proves for the first time the coexistence of redox bifurcated FDH and FOX  
4 activities within a metallo-FDH scaffold. These findings have important implications for  
5 engineering O<sub>2</sub>-tolerant FDHs and bio-inspired artificial metallocatalysts, as well as for the  
6 development of authentic formate/air biofuel cells, modulation of catalytic bias, assessing  
7 the limits of reversible catalysis, understanding directional electron transfer, and  
8 discerning formate bioenergetics of gut microbiota.

## 9 **INTRODUCTION**

10 The simplest carboxylic acid (formic acid), and its conjugate base (formate) are  
11 normal products of metabolic activity in living organisms, including bacteria and humans.<sup>1</sup>  
12 However, bacterial aerobic respiration of formate derived from human gut microbiota  
13 drives inflammatory dysbiosis.<sup>2</sup> Although formic acid is primarily used as a food  
14 preservative (E236) or as silage additive for maintaining the nutritive value of animal feed,<sup>3</sup>  
15 it is a highly sought-after electron-mediator and feedstock in (electro)microbial  
16 bioproduction,<sup>4</sup> as well as a low carbon-footprint molecule that serves as a chemically  
17 robust hydrogen storage medium.<sup>5</sup> In addition to being a carbon and energy source for  
18 the (an)aerobic growth of disparate bacteria,<sup>6</sup> archaea,<sup>7</sup> and syntrophic consortia,<sup>8</sup>  
19 formate can be generated abiotically from CO<sub>2</sub> and renewable electricity.<sup>5</sup>

20 Formate oxidation and CO<sub>2</sub> reduction are interconvertible processes that are  
21 carried out by prokaryotic formate dehydrogenases (FDHs) (Reaction 1).<sup>9, 10</sup>

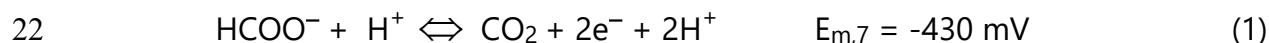

1 There are two phylogenetically distinct FDH families that can be distinguished by their  
2 transition metal ion requirement for enzyme activity.<sup>11</sup> Metallo-FDHs are thought to be  
3 highly sensitive to O<sub>2</sub>,<sup>12, 13</sup> necessitating catalytic measurements under anaerobic  
4 conditions. However, available data in the primary literature are more confusing than  
5 definitive. For example, DvH-FDH3 has been reproducibly shown to be O<sub>2</sub> sensitive<sup>14, 15</sup>  
6 while its ortholog from *D. desulfuricans* ATCC 27774 (Dd) can be purified in air.<sup>16, 17</sup>  
7 Similarly, *D. gigas* (Dg) FDH1 is readily isolated and stored under atmospheric conditions<sup>18</sup>  
8 <sup>19</sup> but its counterpart from DvH requires the presence of 10 mM sodium nitrate to prevent  
9 O<sub>2</sub> inactivation.<sup>20</sup> Regardless of the purification protocols, the resulting enzymes are  
10 'dead on arrival' in that they must be resurrected by lengthy incubations with high  
11 concentrations of thiols (10 – 50 mM dithiothreitol<sup>20</sup> for DvH-FDH1 and 130 mM β-  
12 mercaptoethanol<sup>16, 17, 19</sup> for Dd-FDH3 and Dg-FDH1) and/or formate<sup>17, 21</sup> prior to catalytic  
13 measurements under anaerobic conditions (a representative example can be found in  
14 Figure S5a of Oliveira et al<sup>20</sup>). A satisfactory molecular explanation for these  
15 phenomenological observations has not been forthcoming for over three decades.<sup>18</sup> The  
16 situation is equally unclear with FDHs isolated from organisms other than sulfate-reducing  
17 bacteria (SRB). *Escherichia coli* Fdh-H has been purified and characterized in the presence  
18 of sodium azide to minimize O<sub>2</sub> inactivation.<sup>22, 23</sup> 10 mM sodium nitrate<sup>24, 25</sup> or azide<sup>26, 27</sup>  
19 has been added as stabilizers during the isolation of other bacterial metallo-FDHs as well.  
20 Very little is known about how these small molecules protect the enzyme from O<sub>2</sub>.  
21 Because stability in air does not enable aerobic catalysis, the inhibitors are either removed  
22 prior to measurements under anaerobic conditions<sup>20, 25</sup> or allowed to remain while the  
23 activity is probed anaerobically<sup>23</sup> or in air.<sup>28</sup> To our knowledge, no FDH has been shown  
24 to reversibly interconvert formate and CO<sub>2</sub> in air. Claims to the contrary have been  
25 considered as experimental artifacts.<sup>25</sup> Moreover, mechanistic details regarding how O<sub>2</sub>  
26 reacts with these metalloenzymes are not available.

1           Largely overlooked, however, is the fact that the present-day claims of FDH O<sub>2</sub>  
2 sensitivity fail to recognize or rationalize the findings reported between the late 1920s  
3 and early-1990s vis-à-vis existence of metallo-FDHs capable of oxidizing formate with  
4 oxygen (Reaction 2).

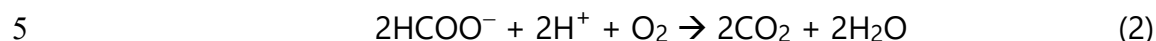

6 Starting with the first purification of a bacterial FDH by Stickland in 1929, O<sub>2</sub> uptake served  
7 as a proxy for measuring enzyme activity.<sup>29</sup> Subsequently, Stephenson and Stickland  
8 isolated *Escherichia coli* hydrogenlyase (Fdh-H), revealing that it was not responsible for  
9 the FOX activity.<sup>30</sup> A key insight regarding the latter came from Gale's demonstration that  
10 formate dependent O<sub>2</sub> consumption by *E. coli* was higher in aerobically grown cells.<sup>31</sup>  
11 Pinsent's groundbreaking study relied on Gale's O<sub>2</sub> utilization assay to convincingly show  
12 that not only *E. coli* FDH requires molybdenum and selenium for function, but more  
13 importantly, that it retained robust FOX activity.<sup>32</sup> This has since been independently  
14 confirmed by several research laboratories.<sup>33-37</sup> Pichinoty went on to show that FOX  
15 activity was broadly distributed across bacteria.<sup>38</sup> Collectively, these findings paved the  
16 way for Sawers to discover the third Fdh-O (O for oxidase; the remaining two being Fdh-  
17 N (nitrate)<sup>39</sup> and Fdh-H (hydrogen)<sup>40</sup>) in *E. coli*.<sup>9, 41, 42</sup> Although others have confirmed the  
18 presence of Fdh-O,<sup>43, 44</sup> isolation and characterization of a metallo-FDH with FOX activity  
19 has remained intractable.<sup>45</sup> And the possibility that coexistence of dehydrogenase and  
20 oxidase activities would render a metallo-FDH insensitive to O<sub>2</sub> has not been entertained  
21 thus far. To tackle this challenge, one of our laboratories (C.S.R.) advanced and tested the  
22 hypothesis that FDHs capable of transferring electrons to natural high potential acceptors  
23 are likely to be O<sub>2</sub>-insensitive by virtue of their FOX activity, for such physiological  
24 reactions are poised to occur under aerobic conditions. Despite the paucity of  
25 information regarding redox partners (two well characterized systems exhibit low

1 reduction potentials.<sup>18, 46</sup>), our central hypothesis was inspired by Yagi's 1969 observation  
2 that an FDH from *D. vulgaris* Miyazaki (DvM) preferentially transfers electrons to a high-  
3 potential cytochrome *c*<sub>553</sub>.<sup>47, 48</sup> Because the genetically tractable DvH<sup>49, 50</sup> is closely related  
4 to DvM<sup>51</sup> and encodes a 73% identical cytochrome *c*<sub>553</sub> ( $E_{m,7} = +62$  mV),<sup>52</sup> we probed the  
5 O<sub>2</sub> sensitivity of periplasmic FDHs from this SRB shown to thrive in microaerobic niches.<sup>53-</sup>  
6 <sup>55</sup> We focused on the poorly characterized DvH-FDH2 (locus tag DVU2482-2481)<sup>56, 57</sup> and  
7 cytochrome *c*<sub>553</sub>-reducing DvH-FDH3 (locus tag DVU2812-2809)<sup>14, 15</sup> instead of the well-  
8 studied DvH-FDH1 (locus tag DVU0587-0588)<sup>20</sup>, which couples anaerobic formate  
9 oxidation to sulfate reduction by initiating electron transfer to a low-potential cytochrome  
10 *c*<sub>3</sub> ( $E_{m,7} = -350$  mV).<sup>50</sup> Here, we describe our discovery and characterization of an O<sub>2</sub>-  
11 insensitive FDH that retains both dehydrogenase and oxidase activities.

## 12 **RESULTS AND DISCUSSION**

13 **Robust Expression Platform for Facile Production of Highly Pure O<sub>2</sub>-Insensitive**  
14 **Metallo-FDHs.** There are three distinct *fdh* loci in the DvH genome<sup>57</sup> (Figure 1A). Only  
15 FDH1 encoded by the first locus is essential for growth when sulfate and formate serve as  
16 electron acceptor and donor, respectively.<sup>50</sup> The cellular function of FDH2 and FDH3 are  
17 not well defined. Oliveira *et al*<sup>20</sup> expressed FDH1 in a  $\Delta fdh1$  deletion strain using the  
18 vectors and strategies developed in one of our laboratories (J.D.W.). We took a different  
19 approach. We reasoned that construction of a markerless FDH-free strain could be  
20 beneficial on three fronts: (a) Facilitate biochemical investigations of a native or foreign  
21 FDH without potential interference from host counterparts, (b) Benchmark whole cell  
22 biocatalysts, and (c) Uncover how synergy between enzyme catalysis and bioenergetics  
23 modulates organismal dynamics. To that end, we generated a DvH strain (JW2127; see  
24 Methods; Tables S1 and S2) that is devoid of all three *fdh* loci. Although JW2127 is unable  
25 to grow on formate-acetate-sulfate, it maintains wild-type-like growth profile on lactate-

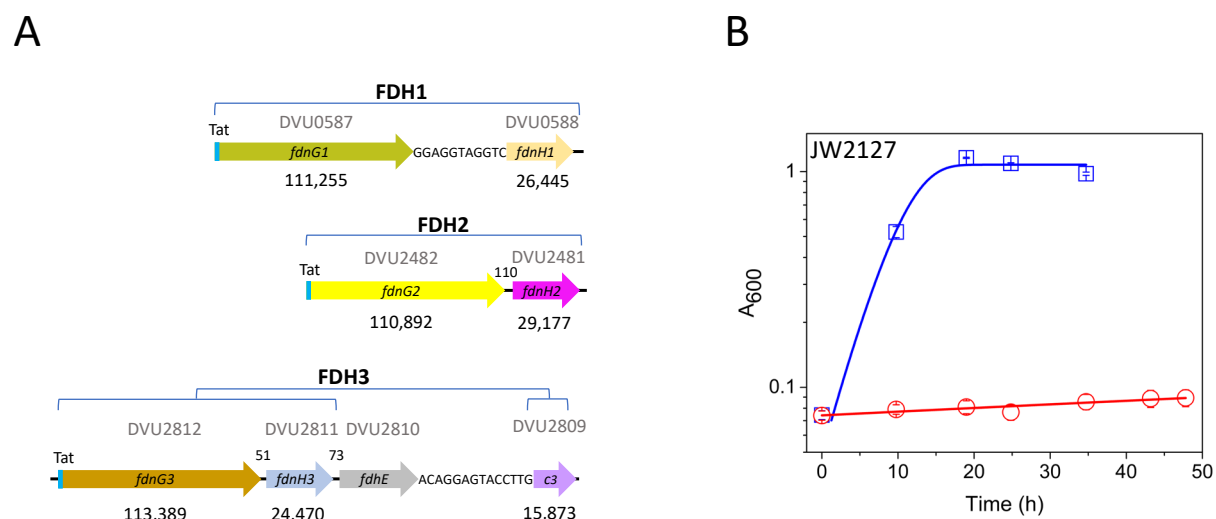

1  
 2 *Figure 1. Structure and function of FDH operons in DvH: (A) Condensed map of the three fdh loci. fdnG2*  
 3 *(yellow; large subunit) and fdnH2 (magenta; small subunit) encode FDH2 investigated in this work and are*  
 4 *part of a five gene (not shown) operon. Short intergenic regions are illustrated at the nucleotide level while the*  
 5 *length of their long counterparts is identified by two- or three-digit numbers. Periplasmic FDH localization is*  
 6 *made possible by the twin-arginine translocation (Tat) signal peptide (cyan). Theoretical molecular masses of*  
 7 *the encoded polypeptide in daltons are listed below each gene. (B) Growth curves of JW2127: formate-acetate-*  
 8 *sulfate (red), lactate-sulfate (blue). The lines going through the points represent fits to Weibull<sup>58</sup> growth model.*  
 9 *Error bars represent standard deviations from three independent measurements.*

10  
 11 sulfate medium (Figure 1B). We also constructed deletion strains harboring different  
 12 combinations of *fdh* genes for functional analyses, including JW2111 ( $\Delta fdh3$ ) and JW2121  
 13 ( $\Delta fdh1$  and  $\Delta fdh3$ ; see Tables S1 and S2). The latter two served as controls in this study  
 14 (Figure S1). Subsequently, we used JW2127 for the homologous expression of FDH2.  
 15 Introduction of a Strep-tag II at the C-terminus of the large subunit facilitated one-step  
 16 affinity purification. Whereas Oliveira *et al*<sup>20</sup> used DvH cells derived from 300 L  
 17 fermentation to purify FDH1, we have streamlined our workflow to produce 1.8 mg of  
 18 highly-pure heterodimeric FDH2 from a gram of wet cell paste (Figures 2A and 2B). Thus,  
 19 our 10 L culture (biomass yield of ~ 8 g) generates sufficient protein to tackle even the  
 20 most demanding experiments. And our method can be readily scaled up.

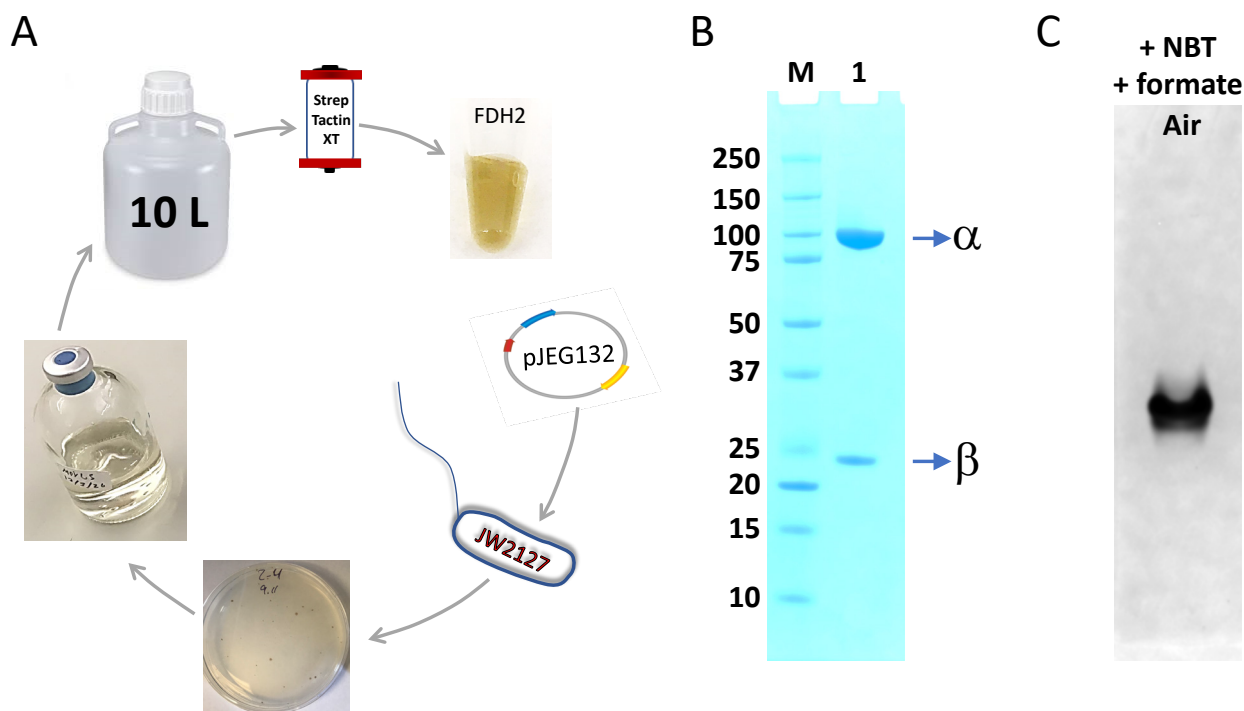

1  
2 *Figure 2. Isolation of DvH-FDH2. (A) Streamlined expression and purification workflow. Single colonies*  
3 *resulting from the transformation of fdh2 plasmid into strain JW2127 were used to start a pre-culture that*  
4 *served as the inoculum for a 10 L scaleup, cells from which were aerobically lysed and subjected to affinity*  
5 *purification, yielding Strep-tagII FDH2. (B) SDS-PAGE of purified protein (lane 1) and molecular weight*  
6 *markers (lane M).  $\alpha$  and  $\beta$  represent the large and small subunits of FDH2, respectively. (C) Following non-*  
7 *denaturing PAGE, FDH2 activity (dark single band) is detectable in air via NBT staining.*  
8

9 Notably, there is a fundamental difference between prevailing strategies for metallo-FDH  
10 isolation and what we have advanced. Our purification workflow (Figure 2) and  
11 downstream handling steps (including storage) occur in air without involving nitrate,  
12 azide, thiols, or formate at any stage of the process.

13 **Aerobic In-Gel Catalysis of Recombinant DvH-FDH2.** Literature precedents exist for  
14 anaerobic activity staining of FDHs in native polyacrylamide gels using 2,3,5-  
15 triphenyltetrazolium chloride<sup>56, 59</sup> or phenazine methosulfate (PMS) / nitroblue  
16 tetrazolium chloride (NBT).<sup>60-62</sup> However, this has not been achieved for any FDH in air.  
17 Because O<sub>2</sub>-insensitive group 5 [NiFe]-hydrogenases have been zymographically  
18 visualized using redox dyes,<sup>63</sup> we asked whether a similar approach could work with DvH-



1 FDH2. When native polyacrylamide gel strips containing recombinant DvH-FDH2 were  
2 incubated aerobically with NBT and formate, a single dark blue colored band appeared  
3 within two minutes (Figure 2C). In the absence of formate, this band was not observed.  
4 The same pattern was recapitulated in the spot assay where the blue color developed  
5 within 15 s (Figure S2). These observations demonstrate that electrons released from  
6 enzymatic aerobic formate oxidation are readily transferred to an artificial electron  
7 acceptor with positive reduction potential ( $E_{m,7} = +50 \text{ mV}^{24,63}$ ), resulting in the generation  
8 of insoluble reduced NBT-formazan precipitates. Furthermore, our results establish that  
9 both nitrate-assisted purification of FDH and/or reductive activation with high  
10 concentration of thiols are not essential for maintaining redox activity under anaerobic or  
11 atmospheric conditions.

12 **[4Fe-4S] Metalloclusters, Tungstopterin, and Selenocysteine Remain Unaffected by**  
13 **O<sub>2</sub> During Catalytic Turnover.** As correctly pointed out by Hagen<sup>64</sup>, the metal specificity  
14 profiles of SRB FDHs remain incompletely described. Moreover, the nature of redox  
15 centers in DvH-FDH2 is unknown.<sup>56</sup> Because DvH-FDH1 and DvH-FDH2 exhibit 61%  
16 protein sequence identity (large subunit) and share all the metal coordination sites within  
17 the two subunits (Figure S3), we surmised that a similar complement of redox centers  
18 must exist in both systems. Since the DvH biomass was derived from a medium containing  
19 Mo (1.24  $\mu\text{M}$ ) and W (0.15  $\mu\text{M}$ ), we predicted a metal ratio of 1Mo/W:16Fe:1Se. Consistent  
20 with this, inductively coupled plasma mass spectrometry (ICP-MS) revealed that for every  
21 mole of <sup>182</sup>W present, another  $17 \pm 1$  moles of <sup>56</sup>Fe and  $0.7 \pm 0.1$  moles of <sup>78</sup>Se were also  
22 found (Table S3). Despite the nine-fold excess of molybdate (excluding contributions  
23 from yeast extract) in the growth culture, we did not detect <sup>95</sup>Mo in our FDH2 samples.  
24 These results underscore definitive tungsten selectivity of DvH-FDH2, distinguishing it  
25 from Mo-specific<sup>14, 56</sup> DvH-FDH3 and the promiscuous DvH-FDH1, which is capable of  
26 incorporating both Mo and W.<sup>20, 56</sup>

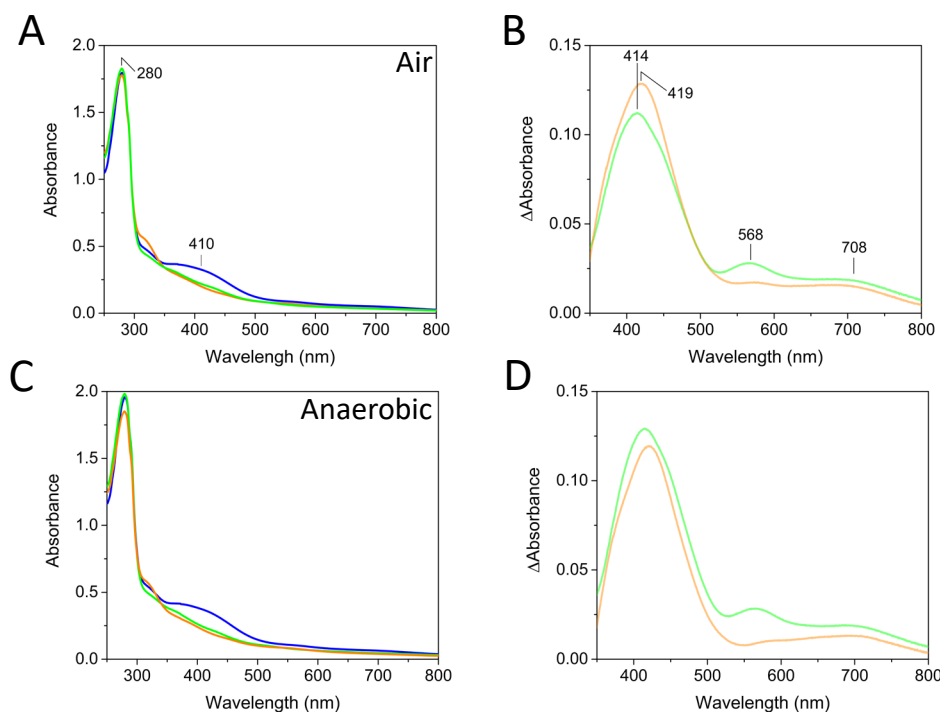

1  
2 *Figure 3. Electronic spectra of DvH-FDH2. As-isolated (blue), formate-reduced (green), and dithionite-reduced*  
3 *(orange) states are shown in panels A and C. Difference spectra are shown in panels B and D. As-isolated*  
4 *minus formate-reduced and as-isolated minus dithionite-reduced are in green and orange, respectively.*  
5

## 6 **Electronic and Electron Paramagnetic Resonance (EPR) Spectral Signatures of DvH-**

### 7 **FDH2 are Virtually Invariant in Air.** The bulk of metallo-FDH electronic spectra in the

8 primary literature have been measured under anaerobic conditions to avoid inactivation  
9 by molecular O<sub>2</sub>.<sup>13, 16, 20, 24, 65</sup> Although aerobic spectra exist for an O<sub>2</sub>-tolerant Mo-Cys-

10 FDH stabilized by 10 mM nitrate,<sup>28</sup> their utility remains unclear, for the addition of formate

11 did not afford a characteristic spectral change. Here, we offer the first functional

12 validation of a W-Sec-FDH in air via electronic spectroscopy. Aerobically purified DvH-

13 FDH2 is brown in color and shows a broad S → Fe<sup>3+</sup> charge transfer transition at 412 nm

14 (Figure 3A, blue trace), which is characteristic of [4Fe-4S]<sup>2+</sup> clusters.<sup>66</sup> Addition of formate

15 leads to a substantial loss of this signal, indicating reduction to the [4Fe-4S]<sup>+</sup> state (Figure

16 3A, green trace). Independently, reduction with dithionite yields a similar result (Figure

17 3A, orange trace). Employing anaerobic conditions makes no difference to the outcome

1 (Figure 3C). The virtually identical lineshape and amplitude of the difference spectra  
2 (Figure 3B,D) illustrate that formate completely reduces (six reducing equivalents; four  
3  $[4\text{Fe-4S}]^{2+}$  clusters and one W center) the majority of catalytically competent FDH2 in  
4 solution. As dithionite would be expected to reduce both functional and non-functional  
5 metal centers, we conclude that >94% of DvH-FDH2 is functionally fit. We have also  
6 obtained the source DvH-FDH1 spectrum (Figure S4, pink trace, of Oliveira et al (2020))  
7 and compared it with our as-isolated DvH-FDH2 counterpart acquired under anaerobic  
8 conditions (Figure S4). The  $A_{400}/A_{280}$  ratio—an indicator of the extent of cluster loading<sup>67</sup>—  
9 estimated from these spectra are 0.18 (DvH-FDH2) and 0.17 (DvH-FDH1), affirming that  
10 the two orthologs exhibit comparable protein purity and cofactor integrity.

11 To evaluate the predictions made via electronic spectroscopy, we pursued EPR  
12 measurements. Figure 4 shows the EPR spectra seen with reduced DvH-FDH2 under a  
13 variety of conditions, as well as the spectra for the as-isolated protein (panels (i), (v)). At  
14 15K, we observed predominantly two distinct EPR signals (Figure 4A(ii)-(iv)), the relative  
15 intensities of which are essentially independent of reductant (formate or dithionite) and  
16 environment (anaerobic or air). The signals are consistent with the presence of reduced  
17 iron sulfur clusters. At 26K, one of the signals is significantly broadened (Figure 4A(vi)-  
18 (viii)) while by 40K both signals have disappeared (data not shown). This behavior is  
19 consistent with fast relaxing  $[4\text{Fe-4S}]$  clusters. There is also some indication of additional  
20 signals (Figure 4A, red arrows), which are described in more detail below.

21 The simulated spectrum for the formate-reduced DvH-FDH2 prepared under  
22 aerobic conditions and collected at 15K from Figure 4(iii) is shown in Figure S5, and the  
23 simulation parameters given in Table S4. The g-values obtained are again consistent with  
24 iron-sulfur clusters and the relative contribution of each cluster is approximately 1:0.75,  
25 indicating almost a complete reduction of both centers. At higher microwave power, no  
26 indication of additional signals was observed. The absence of additional signals in the  
27 four-cluster FDH2 seen here is reminiscent of *D. gigas* W-FDH1 results,<sup>68</sup> where the two

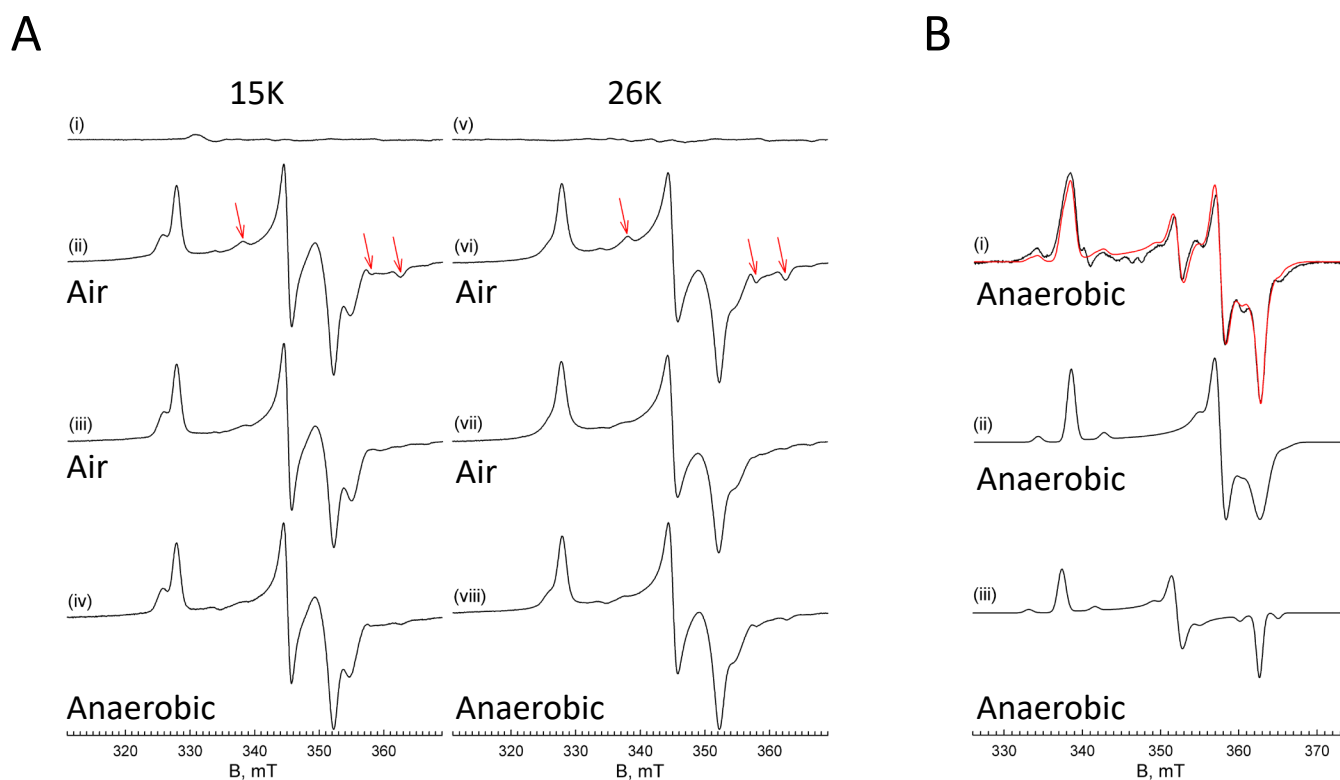

1  
2 **Figure 4:** EPR spectra of DvH-Fdh2. (A). (i), (v) as isolated (45  $\mu$ M). (ii), (vi) dithionite-reduced (45  $\mu$ M). Red  
3 arrows indicate approximate location of  $W^V$   $g$  tensors. (iii), (vii) formate-reduced aerobic (45  $\mu$ M). (iv), (viii)  
4 formate-reduced anaerobic (27  $\mu$ M). (i)-(iv) were collected with 10 Gauss modulation amplitude and 0.2  
5 mW power at 15K. (v)-(viii) were collected with 10 Gauss modulation amplitude and 4 mW power at 26K.  
6 (B) Simulation of the W center of dithionite-reduced sample. (i)  $W^V$  EPR spectrum (black trace) and  
7 simulation (red trace) of 150  $\mu$ M Fdh2 collected with 8 Gauss modulation amplitude and 10 mW power at  
8 108K. (ii), (iii) Scaled individual contributions to the simulation of the composite spectrum in (i). Simulation  
9 includes hyperfine splittings originating from the 14.3% naturally occurring  $^{183}\text{W}$  ( $I = 1/2$ ). Simulation  
10 parameters are presented in Table S4.

11  
12 observed signals represent pairs of Fe/S clusters with similar  $g$ -values. Alternatively, the  
13 remaining two clusters present in DvH-FDH2 may have reduction potentials that are too  
14 low to be reduced by formate or dithionite to any appreciable degree.<sup>69</sup>

15 When 150  $\mu$ M enzyme is incubated with dithionite under anaerobic conditions for  
16 an extended amount of time ( $\sim$ 12 hours or more) and the spectrum is collected at 108K,

1 an additional pair of signals are obtained (Figure 4B(i)); there is no evidence of the Fe/S  
2 signals described in Figures 4A and S5 at this temperature. The new signals persist from  
3 15K all the way to 108K without considerable line broadening, consistent with their arising  
4 from slowly relaxing W(V) species. Their simulations are superimposed on the  
5 experimental spectra. Figure 4B(ii) and (iii) present the component spectra scaled to their  
6 contribution to the composite simulation in Figure 4B(i). The simulation parameters are  
7 presented in Table S4 and include the well-resolved tungsten  $I=1/2$  hyperfine splittings  
8 originating from the 14.3% natural abundance  $^{183}\text{W}$  isotope. The presence of the  $I=1/2$   
9 hyperfine splitting is further evidence that these signals arise from the tungsten center  
10 rather than additional Fe/S clusters. The simulations indicate that the two species are in  
11 an approximate ratio of 1:0.54 and the  $g$ -values ( $g_{1-3} = 1.982, 1.876, 1.849$  and  $1.904, 1.849,$   
12  $1.914$ , respectively) are in good agreement with those seen from other W-containing  
13 enzymes. Somewhat surprisingly, the large anisotropy of the W(V)  $g$ -values more closely  
14 resembles the "low potential" signal for the *P. furiosus* aldehyde ferredoxin  
15 oxidoreductase (AOR), which is a member of a different family of tungsten-containing  
16 enzyme than the FDHs.<sup>70</sup> The presence of multiple W(V) signals in a single sample has  
17 been seen with a number of W-containing enzymes and may be due to the presence of  
18 inactive species in addition to the catalytically competent one, which is a rather common  
19 feature of W-containing enzymes.<sup>64</sup>

20 **Full Progress Curves Reveal High Catalytic Efficiency Under Atmospheric Conditions**  
21 **and Lack of Enzyme Inactivation or Product Inhibition.** To the best of our knowledge,  
22 solution enzyme kinetics investigations of metallo-FDHs have not directly probed formate  
23 depletion or  $\text{CO}_2$  production. Instead, low-potential artificial electron acceptors, most  
24 commonly benzyl viologen (BV;  $E_{m,7} = -360 \text{ mV}^{24}$ ) and methyl viologen (MV;  $E_{m,7} = -446$   
25  $\text{mV}^{24}$ ) for the forward and reverse reactions, respectively, have been routinely used as  
26 surrogates to report on catalytic robustness. Although cautions have been raised against  
27 trusting kinetic parameters derived from the use of these "inefficient and slow redox

1 *mediators*<sup>71,72</sup>, they continue to be favored. Mo-Cys-FDHs offer an alternative by making  
2 it possible to track NAD<sup>+</sup> reduction or NADH oxidation.<sup>24, 28</sup> Unfortunately, this strategy  
3 can be extended only to select metallo-FDHs and it is prone to yield false-positive results  
4 when interrogating aerobic CO<sub>2</sub> reduction with aerotolerant enzymes.<sup>25</sup> To further  
5 complicate matters, FDHs from SRB are in a class of their own (Table S5). Unlike other  
6 bacterial FDHs, these retain little to no activity after purification, requiring lengthy  
7 reductive activation with high concentration of thiols and/or formate.<sup>17, 20</sup> Finally, it is  
8 impossible to assess the validity or robustness of the published results when experimental  
9 data remains inaccessible – we are not aware of a report on metallo-FDH enzymology that  
10 has disclosed a complete set of raw absorbance versus time data used to extract kinetics  
11 parameters.

12 To resolve these uncertainties, we explored rigorous and reproducible solution  
13 enzyme kinetics approaches capable of yielding results with functional information  
14 content. First, we assessed catalytic efficiency with two chemically distinct artificial  
15 electron acceptors, one each from the low- (BV) and high-potential (PES/DCPIP) E<sub>m,7</sub> =  
16 +217 mV<sup>24</sup>) categories. Only the latter afforded the ability to acquire kinetics data both  
17 in air and under argon. Second, we identified conditions under which full progress curves  
18 could be measured. Such an approach is only possible for stable enzymes that catalyze a  
19 single-substrate irreversible reaction in the absence of enzyme inactivation or product  
20 inhibition (see below).<sup>73-76</sup> And third, we have simultaneously analyzed several full  
21 progress curves using dynamic simulation-based global fitting<sup>75</sup> to extract  $k_{cat}$  and  
22  $k_{cat}/K_m$ . This strategy overcomes the limitations of classical steady-state analysis, such as  
23 the use of only the first few seconds of data, unreliable initial velocity values, and  
24 overparameterization.<sup>77</sup> To benchmark our models (Schemes 1 and S1), we obtained  
25 source BV enzyme kinetics data that formed the basis of Figure S3 and Figure 1C of Maia  
26

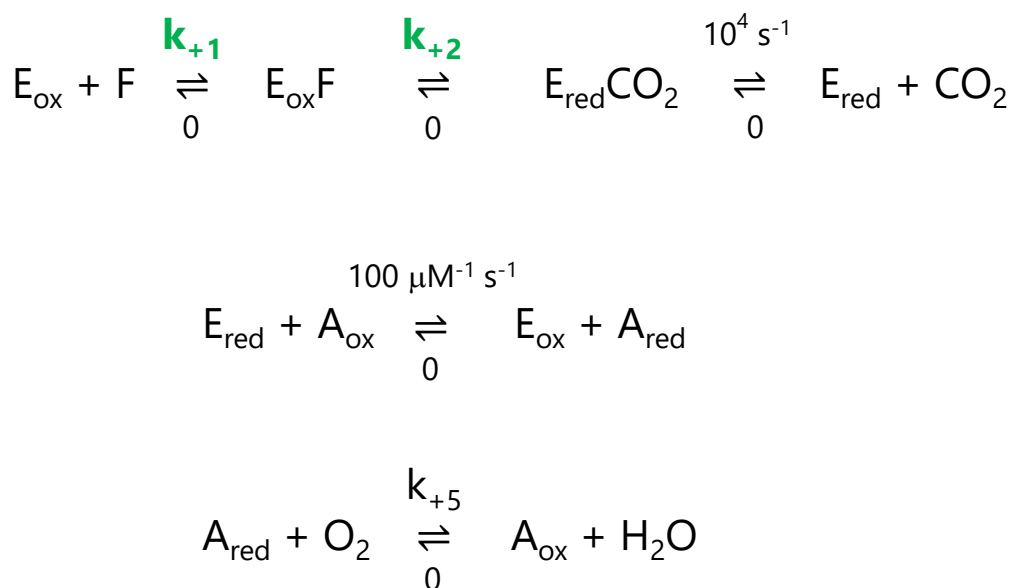

1  
 2 *Scheme 1. Minimal catalytic model used solely for estimating  $k_{\text{cat}}/K_m$  ( $k_{+1}$ ) and  $k_{\text{cat}}$  ( $k_{+2}$ ) from full progress*  
 3 *curves via dynamic simulation-based global fitting.  $E_{\text{ox}}$  and  $E_{\text{red}}$  represent oxidized and reduced enzyme,*  
 4 *respectively.  $A_{\text{ox}}$  and  $A_{\text{red}}$  denote oxidized and reduced forms of the electron acceptor, respectively.  $F$ , formate.*  
 5 *The rate of product release ( $k_{+3}$ ) is set to a high value, facilitating the reaction chemistry to define  $k_{\text{cat}}$ .*  
 6 *Reaction of  $E_{\text{red}}$  with  $A_{\text{ox}}$  ( $k_{+4}$ ) is assumed to be diffusion limited. Rationale for setting reverse rate constants*  
 7 *to zero has been explained by Johnson.<sup>77</sup> The last equation is relevant only under aerobic conditions. Also, see*  
 8 *Scheme S1.*

9  
 10 *et al*<sup>17</sup> (*Desulfovibrio desulfuricans* FDH3) and Oliveira *et al*<sup>20</sup> (DvH-FDH1), respectively.  
 11 Global fitting of the steady-state progress curves from the former work allowed us to  
 12 recapitulate the published values (Figure S6). Although Oliveira *et al*<sup>20</sup> only reported  
 13 results from the initial velocity data, we were able to extract five full progress curves from  
 14 their source data and perform *de novo* analysis (Figure S7A-C). In addition to finding  $k_{\text{cat}}$   
 15 values in the reported range, our method redefines the  $K_m$  of DvH-FDH1 to be  $4.6 \pm 0.3$   
 16  $\mu\text{M}$  rather than  $17 \mu\text{M}$  (Figure S7D-F). These observations illustrate that our catalytic  
 17 models are poised to extract reliable kinetic parameters from DvH-FDH2 progress curves.

18 Because the original characterization of native DvH-FDH2 –by the same laboratory  
 19 that has reported extensively on DvH-FDH1– was done using 2 mM BV (see Table S5),<sup>56</sup>

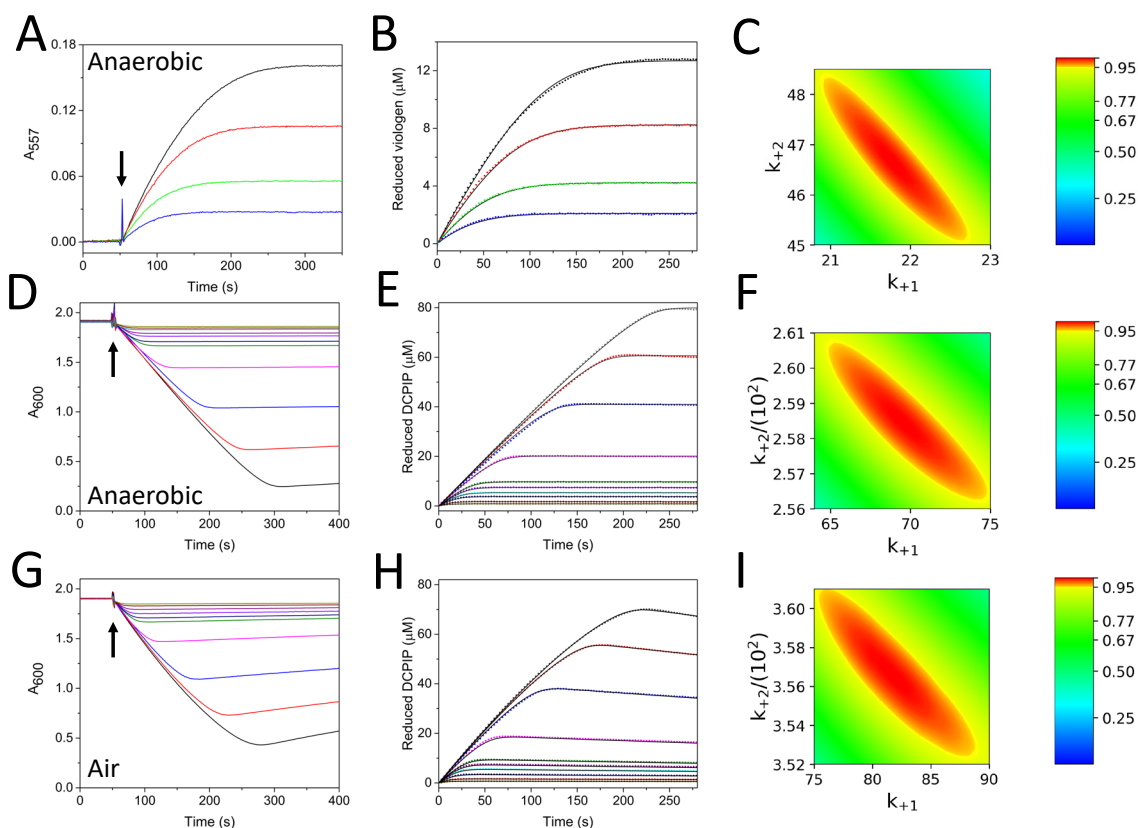

1  
2 *Figure 5. Full progress curve probing of DvH-FDH2 catalysis. Raw experimental traces are shown in A (BV), D*  
3 *(PES/DCPIP), and G (PES/DCPIP) panels. Arrows represent the point at which the experiments were started by*  
4 *either the addition of formate (panel A) or FDH2 (panels D and G). Data normalized for electron acceptor*  
5 *concentration (B, E, and H panels) were globally fit (solid lines) using Kintek Explorer. Whereas panel B was fit*  
6 *to model shown in Scheme S1, panels E and H were fit to the counterpart in Scheme 1. Confidence contour*  
7 *analysis (panels C, F, and I) illustrates that both  $k_{+1}$  ( $k_{cat}/K_m$ ) and  $k_{+2}$  ( $k_{cat}$ ) are well constrained by the kinetic*  
8 *data. Upper and lower bounds of each rate constant is reflected by the axes labels. When plotted as a function*  
9 *of one another, red ovals signify the extent of variability in  $k_{+1}$  and  $k_{+2}$  while still being constrained by the*  
10 *model. Consequently, both parameters display a defined boundary (red),  $\chi^2$  of which is 0.95 (side bar). Table*  
11 *1 lists rate constants, as well as best fit parameters derived from this analysis.*

12  
13 we attempted to reproduce the published results with aerobically purified recombinant  
14 DvH-FDH2. However, our enzyme was added to the reaction mix without any pre-  
15 activation with thiols or formate. Although DvH-FDH2 displays redox activity in air (Figure  
16 2C), abiotic reaction of reduced BV<sup>+</sup> with O<sub>2</sub> made us employ strict anaerobic conditions.  
17 Since our measurements were not made inside an anaerobic chamber, we ensured anoxic  
18 conditions by adding 1 unit/mL of glucose oxidase (GO). Catalase was also



Table 1. Parameters gleaned from full progress curve analysis<sup>#</sup>

| Electron acceptor   | $k_{\text{cat}}$ (s <sup>-1</sup> ) | $K_m$ (μM) <sup>‡</sup> | $k_{\text{cat}}/K_m$ (μM <sup>-1</sup> s <sup>-1</sup> ) | Product stoichiometry <sup>§</sup> | Enzyme inactivation | Product inhibition |
|---------------------|-------------------------------------|-------------------------|----------------------------------------------------------|------------------------------------|---------------------|--------------------|
| 2 mM BV (anaerobic) | 47 ± 2                              | 2.1 ± 0.1               | 22 ± 1.1                                                 | 2BV <sup>+</sup> :1F               | No                  | No                 |
| DCPIP (anaerobic)   | 258 ± 3                             | 3.7 ± 0.3               | 69 ± 6                                                   | 1DCPIP:1F                          | No                  | No                 |
| DCPIP (air)         | 354 ± 5                             | 4.5 ± 0.4               | 79 ± 6                                                   | 1DCPIP:1F                          | No                  | No                 |

<sup>#</sup>Errors for  $k_{\text{cat}}$  and  $k_{\text{cat}}/K_m$  via confidence contour analysis implemented in FitSpace Explorer

<sup>‡</sup>Standard error values for  $K_m$  (calculated from  $k_{\text{cat}}$  and  $k_{\text{cat}}/K_m$ ) estimated according to Johnson (2019)

<sup>§</sup>F, formate; BV<sup>+</sup>, reduced benzylviologen

1  
2 included to eliminate H<sub>2</sub>O<sub>2</sub> that may arise from GO activity. Global fitting of full progress  
3 curves (1,2,4, and 6 μM formate) yielded values comparable to those reported by da Silva  
4 *et al*<sup>56</sup> (Figure 5A-C, Table 1). Furthermore, our progress curves revealed that two  
5 molecules of BV<sup>+</sup> are generated for every formate molecule oxidized by DvH-FDH2.  
6 Despite elimination of the reductive activation step, the enzymatic parameters derived  
7 from our standard steady-state kinetics analysis were virtually identical to the published  
8 values (Table S6), suggesting that the pre-activation step introduced by da Silva *et al*  
9 (2011) had no effect on the outcome. In our hands, DvH-FDH2 exhibits catalytic  
10 parameters that are roughly an order of magnitude smaller than their DvH-FDH1  
11 counterparts (Table S6 and Figure S7F). A closer inspection of product stoichiometry at  
12 high formate concentrations suggested that BV concentration could be limiting (Figure  
13 S8). Therefore, we repeated the experiments at 20 mM BV. This restored 2BV<sup>+</sup>:1F

1 stoichiometry across the board but catalytic parameters did not change appreciably  
2 (Figure S9, Table S6). We have also confirmed that addition of GO and catalase do not  
3 interfere with the results of activity measurements (Figure S10).

4 Collectively, the observations above suggest that BV is not a good electron  
5 acceptor for DvH-FDH2. To test this hypothesis, we independently pursued activity assays  
6 with PES/DCPIP. Consistent with literature precedents on dehydrogenases,<sup>78</sup> phenazine  
7 ethosulfate (PES;  $E_{m,7} = +65 \text{ mV}^{79}$ ) was required for transferring electrons from FDH to  
8 DCPIP (Figure S11A). By varying the concentrations of DCPIP and PES, we were able to  
9 identify optimal conditions that would support activity measurements both in air (Figure  
10 S11B-F and Figure S12) argon (Figure S13). At DCPIP concentrations below  $100 \mu\text{M}$ , global  
11 fitting of anaerobic full progress curves (Scheme 1 and Figure 5D-F) resulted in roughly  
12 five-fold higher turnover number (TN) than what we obtained with  $2 \text{ mM}$  BV (Table 1).  $K_m$   
13 values did not show a significant difference, however. The same pattern was reproduced  
14 when the measurements were made in air (Figure 5G-I). A key difference between the  
15 two conditions is that the slow reoxidation ( $k_{+5} = 3 \pm 0.5 \times 10^{-6} \mu\text{M}^{-1} \text{ s}^{-1}$ ; see last equation  
16 in Scheme 1) of reduced DCPIP by  $\text{O}_2$  caused the post reaction region to slope slightly  
17 upward (Figure 5G, Figure S11D, and Figure S12B). However, this should not be confused  
18 with alterations to the shape of progress curves stemming from product inhibition,<sup>75</sup>  
19 which we did not observe when DCPIP (Figure 5G) or BV (Figure 5A) served as electron  
20 acceptors. In fact, a product stoichiometry of one reduced DCPIP for every formate  
21 oxidized was reproducibly found in our measurements (Table 1). Since addition of fresh  
22 substrate at the end of a progress curve cleanly reproduced the original trace (Figure  
23 S12F), we can further ascertain that the enzyme was stable and fully active during catalysis  
24 in air. Taken together, PES/DCPIP-dependent catalytic parameters obtained from global  
25 fits are in excellent agreement with those from our initial velocity calculations (Table S6).  
26 And the TN with PES/DCPIP remains virtually the same under anaerobic and aerobic

1 conditions. Notably, the catalytic efficiency of DvH-FDH2 in air is in the range of  $7 \times 10^7$   
2  $\text{M}^{-1} \text{s}^{-1}$  (Table 1), which is comparable to that reported for DvH-FDH1<sup>20</sup> ( $\sim 8 \times 10^7 \text{M}^{-1} \text{s}^{-1}$ )  
3 <sup>1</sup>) when BV serves as the electron acceptor under anaerobic conditions. Moreover, our  
4 PES/DCPIP-based TN and  $k_{\text{cat}}/K_{\text{m}}$  for formate oxidation are roughly an order of magnitude  
5 and 500-fold higher, respectively, than what has been reported for the aerotolerant Mo-  
6 Cys-FDH from *Rhodobacter capsulatus* using the natural ( $\text{NAD}^+$ ) electron acceptor.<sup>28</sup>  
7 Finally, we have found that the inhibition profiles of DvH-FDH2 in the presence of azide  
8 or nitrate are not significantly impacted by  $\text{O}_2$  (Figures S14 and S15). Whereas azide  
9 blocks the enzyme with an  $\text{IC}_{50}$  of about 0.8 mM, nitrate is far less effective.

#### 10 **Catalytic Redundancy or Gain of a New Enzyme Function? Exploiting the Peck-Gest** 11 **Paradigm to Seek Insights into How FDHs May Have Evolved to Achieve Aerobic**

12 **Catalysis.** Our full progress curve analysis establishes that both  $k_{\text{cat}}$  and  $k_{\text{cat}}/K_{\text{m}}$  are  
13 severely underestimated when BV is used as the electron acceptor. It also reveals a  
14 preference for the latter viz., whereas DvH-FDH2 favors high-potential acceptors, such as  
15 PES/DCPIP or NBT, DvH-FDH1 is highly active with BV<sup>20</sup>. Although DCPIP data is not  
16 available for the latter enzyme, a close ortholog (Dg-FDH1) only shows 10% of BV activity  
17 with the high-potential acceptor.<sup>18</sup> Such linkages take on special significance when  
18 multiple FDHs encoded by the same organism are compared. In 1957, Peck and Gest<sup>80</sup>  
19 discovered two types of FDH in *Escherichia coli* solely based on their preference for  
20 artificial electron acceptors – one was linked to PMS/DCPIP and its expression was  
21 confined to  $\text{O}_2$ /nitrate-respiring cells while the other was BV-linked and unique to non-  
22 respiring cells (reviewed by Stewart<sup>39</sup>). It is now clear that Fdh-N is DCPIP-linked,<sup>61</sup> and  
23 Fdh-H is BV-linked. The third poorly characterized variant of *E. coli*, Fdh-O, is also DCPIP-  
24 linked.<sup>42</sup> Extending the Peck-Gest paradigm to DvH –only the second microbe for which  
25 all three FDHs have now been characterized– we would predict that the BV-linked FDH1

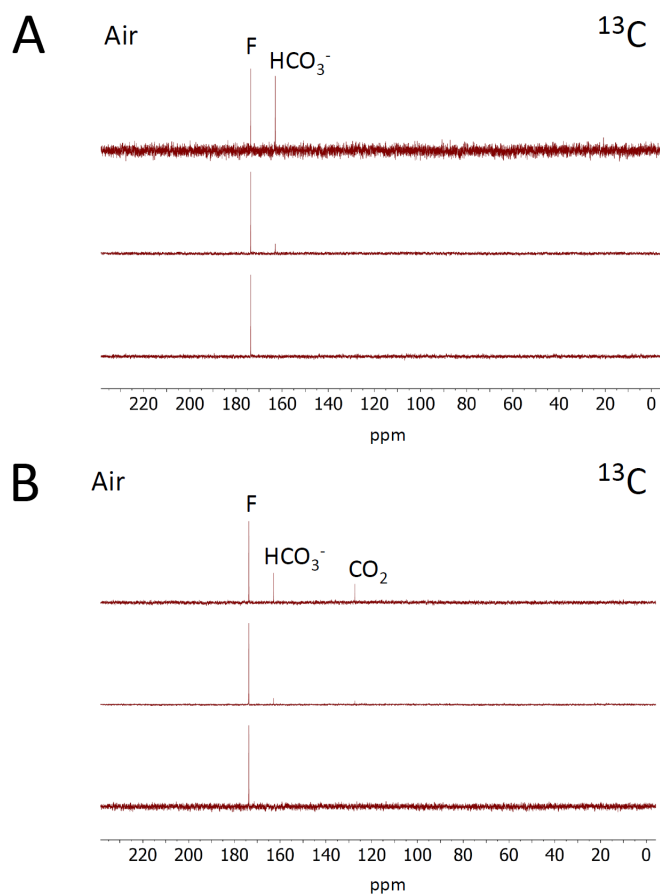

1  
2 *Figure 6. Product generated by DvH-FDH2 catalyzed reaction.  $^{13}\text{C}$  NMR spectra at pH 7.5 (A) and pH 6 (B).*  
3  *$^{13}\text{C}$ -formate (bottom),  $^{13}\text{C}$ -formate + enzyme (middle),  $^{13}\text{C}$ -formate + enzyme + PES (top).*  
4

5 is involved in anaerobic respiration and that the PES/DCPIP-linked FDH2 plays a role in  
6 aerobic respiration. It has already been established that FDH1 is essential for anaerobic  
7 sulfate respiration when formate serves as the electron donor.<sup>50</sup> Biological function of  
8 FDH2 remains to be elucidated. Our study proves that catalytic parameters derived from  
9 viologen-based measurements lack functional information content to make predictions  
10 about how well a given FDH would perform under aerobic conditions. Instead, high  
11 catalytic performance on BV only guarantees activity under anaerobic conditions.  
12 Confirmation bias has boosted reliance on viologen-based kinetics and stymied efforts to  
13 uncover  $\text{O}_2$ -immune FDHs that can reversibly function in air. This is best exemplified by  
14 DvH-FDH2, which exhibits the lowest TN with BV (Table S5) and yet is the most  $\text{O}_2$ -

1 insensitive of all metallo-FDHs characterized to date from any bacterium. Therefore,  
2 biological context must factor critically into future search efforts aimed at discovering air  
3 insensitive FDHs.

4 **CO<sub>2</sub> is the Product of Aerobic Formate Oxidation by DvH-FDH2.** Although several  
5 metallo-FDHs have been investigated, there is just one report in the literature describing  
6 the product resulting from enzymatic oxidation of formate under anaerobic conditions.<sup>23</sup>  
7 In all remaining works, product formation is implied based on the reduction of a natural  
8 (NAD<sup>+</sup>) or artificial electron acceptor, which is often BV. Although we have used two  
9 different artificial electron acceptors in this study, we made sure to leave no stone  
10 unturned where product analysis in air is concerned. At pH 7.5, combining DvH-FDH2  
11 with isotopically labeled <sup>13</sup>C-formate readily yields a discernible H<sup>13</sup>CO<sub>3</sub><sup>-</sup> resonance at  
12 162.93 ppm (Figure 6A, middle and Figure S16) via <sup>13</sup>C NMR spectroscopy. Addition of  
13 PES to the mix substantially enhances the resonance intensity, indicating that the number  
14 of turnovers has increased in the presence of an artificial electron acceptor (Figure 6A,  
15 top; Figure S17). This hints at the likelihood that O<sub>2</sub> may not be a good electron acceptor  
16 for DvH-FDH2 despite its abundance under our experimental conditions (257 μM at 25  
17 °C). Similarly, at pH 6, both H<sup>13</sup>CO<sub>3</sub><sup>-</sup> (162.88 ppm) and <sup>13</sup>CO<sub>2</sub> (127.29 ppm) resonances  
18 appear, and their intensities amplify when PES is included (Figure 6B, middle and top,  
19 respectively; Figures S18 and S19). As a positive control, we have confirmed that  
20 NaH<sup>13</sup>CO<sub>3</sub>, in isolation at pH 6, generates H<sup>13</sup>CO<sub>3</sub><sup>-</sup> and <sup>13</sup>CO<sub>2</sub> resonances at positions  
21 identical to those found with enzymatic formate oxidation (Figure S20). These chemical

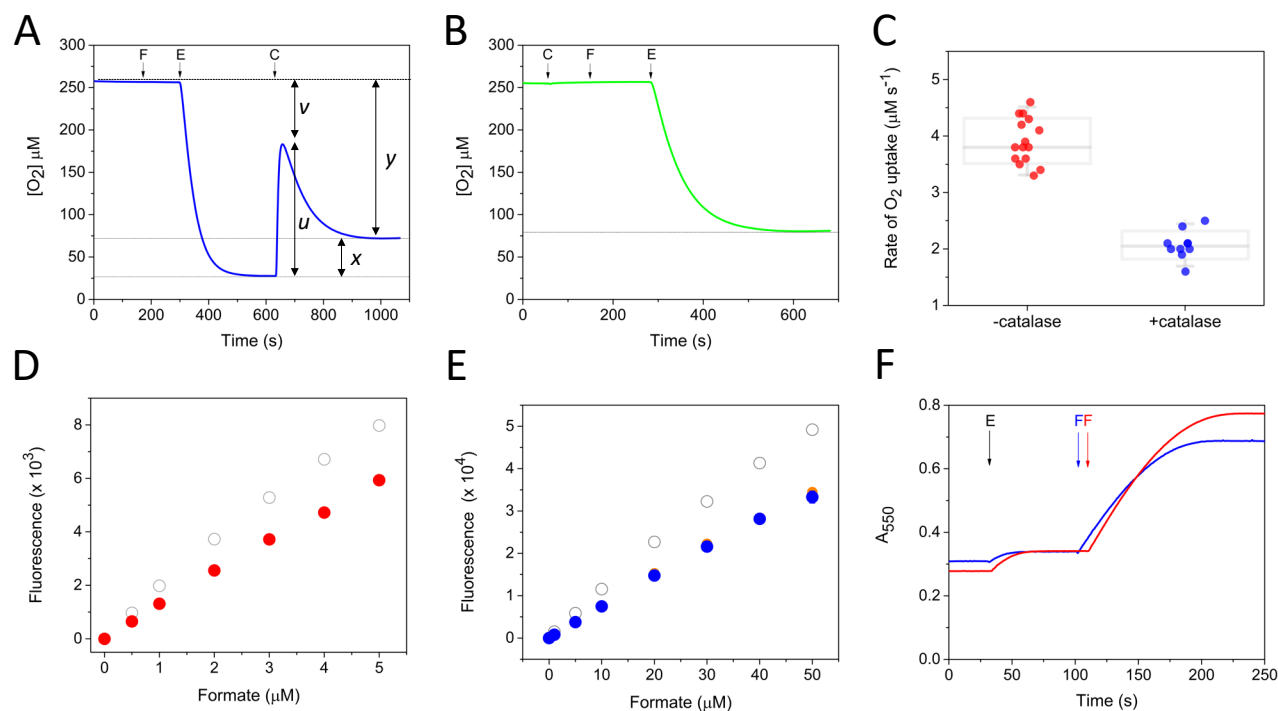

1  
 2 *Figure 7. Mechanistic basis of DvH-FDH2 O<sub>2</sub> insensitivity. (A) Oximetry reveals coupling of formate oxidation*  
 3 *to O<sub>2</sub> reduction. (B) Oximetry in the presence of catalase. (C) Comparison of O<sub>2</sub> uptake rates in the absence*  
 4 *(n = 15) and presence (n = 10) of catalase. Both dot and box plots are shown with the latter deemphasized*  
 5 *due to medium sample size.<sup>81</sup> (D) Enzymatic H<sub>2</sub>O<sub>2</sub> generation monitored via Amplex Red assay (filled red*  
 6 *circles) (n=3). (E) Enzymatic H<sub>2</sub>O<sub>2</sub> production evaluated using the CBA assay (filled blue circles) (n=3). Filled*  
 7 *orange circles represent data obtained at 10 nM FDH2. In both D and E panels, open grey circles represent*  
 8 *H<sub>2</sub>O<sub>2</sub> standard curve determined in the absence of formate or FDH2. (F) Reduction of equine cytochrome c*  
 9 *under aerobic (blue) and anaerobic (red) conditions (n = 3). Points of addition of formate (F), enzyme (E =*  
 10 *FDH2), and catalase (C), are identified by down arrows. u, v, x, and y are defined in the text.*  
 11

12 shifts agree well with those reported in the literature.<sup>82</sup> <sup>13</sup>C-formate was independently  
 13 validated by both <sup>1</sup>H and <sup>13</sup>C NMR spectra. Whereas the latter generates a single  
 14 resonance at 173.65 ppm (Figures 6A and 6B, bottom; Figures S21 and S22), *J*-coupling  
 15 (~ 195 Hz) between the <sup>1</sup>H and <sup>13</sup>C atoms splits <sup>1</sup>H spectrum of <sup>13</sup>C-formate into two  
 16 resonances (8.66 ppm and 8.27 ppm) (Figure S23). Despite the poor sensitivity of <sup>13</sup>C

1 NMR spectroscopy<sup>83</sup> and not optimizing data collection for  $5 \times T_1$  (relaxation time), we  
2 succeeded in demonstrating that CO<sub>2</sub> is the true product of aerobic catalysis.

3 **FOX Activity Generates H<sub>2</sub>O<sub>2</sub>, Enabling Oxygen Insensitivity of DvH-FDH2.** To  
4 understand how DvH-FDH2 deals with O<sub>2</sub>, we used a Clark-type O<sub>2</sub> electrode to ask  
5 whether formate oxidation under atmospheric conditions is coupled to O<sub>2</sub> reduction.  
6 Addition of enzyme to formate-containing aerobic buffer led to robust O<sub>2</sub> consumption  
7 (Figure 7A). Once the signal plateaued, catalase was added. This led to O<sub>2</sub> evolution  
8 followed by O<sub>2</sub> uptake until a plateau was reached, suggesting the production of H<sub>2</sub>O<sub>2</sub>  
9 via 2e<sup>-</sup> reduction of O<sub>2</sub> (reaction 3).

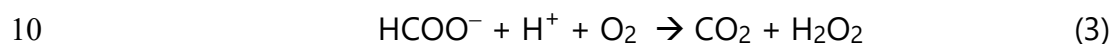

11 We attempted a calculation of the electron flux that led to H<sub>2</sub>O<sub>2</sub> formation.<sup>84, 85</sup> The  $x/y$   
12 value in Figure 7A would imply that roughly one quarter of the electrons from formate  
13 were ending up in H<sub>2</sub>O<sub>2</sub>. However, this is likely to be an underestimate because formate  
14 was in large excess and was continuing to be oxidized post dismutation of H<sub>2</sub>O<sub>2</sub> by  
15 catalase, manifesting as the second O<sub>2</sub> uptake step. Instead, if we considered the  $u/v$   
16 value, ~ 80% of the electron flux goes towards peroxide generation. To resolve this  
17 uncertainty, we pursued the kinetics approach developed by Lu and colleagues.<sup>86</sup> By  
18 comparing the initial velocities of O<sub>2</sub> uptake in the absence (Figure 7A) and presence  
19 (Figure 7B) of catalase, we found that it was 50% lower in the latter (Figure 7C). And the  
20 rates did not vary significantly between pH 6.0 and 8. This outcome suggested that H<sub>2</sub>O<sub>2</sub>  
21 was the major product of O<sub>2</sub> reduction during aerobic formate oxidation. Appropriate  
22 controls were built into our experimental design for evaluating alternate endpoints. H<sub>2</sub>O<sub>2</sub>  
23 addition in the absence of exogenous catalase showed that DvH-FDH2 lacks catalase  
24 activity (Figure S24A). To rule out the possibility of abiotic O<sub>2</sub> consumption, DvH-FDH2

1 was heat denatured and subjected to oximetry. Neither O<sub>2</sub> uptake nor H<sub>2</sub>O<sub>2</sub> generation  
2 was found (Figure S24B). Moreover, inclusion of 1 mM EDTA minimized artifacts arising  
3 from transition metal contaminants. Even with these controls in place, we could not  
4 eliminate the possibility that atmospheric O<sub>2</sub> was completely excluded during oximetry.  
5 Therefore, we pursued two orthogonal approaches to directly quantify H<sub>2</sub>O<sub>2</sub>. In the first  
6 method, horseradish peroxidase (HRP) catalyzed formation of fluorescent resorufin from  
7 H<sub>2</sub>O<sub>2</sub> and amplex red was monitored. We observed that for every mole of formate  
8 oxidized, roughly 0.75 mole of H<sub>2</sub>O<sub>2</sub> was produced during aerobic DvH-FDH2 catalysis  
9 (Figure 7D). Inclusion of catalase abolished the fluorescence signal and denatured  
10 enzyme failed to yield H<sub>2</sub>O<sub>2</sub> (Figure S25). However, the inability of amplex red assay to  
11 quantify H<sub>2</sub>O<sub>2</sub> beyond 5 μM made it impossible for us to investigate the consequences of  
12 O<sub>2</sub> reduction at formate concentrations approaching 10 – 20K<sub>m</sub>. Furthermore, despite  
13 being considered the gold standard, this assay is prone to artifacts.<sup>87, 88</sup> For example,  
14 interferences stem from interaction between redox enzymes and resorufin<sup>89</sup>. To  
15 overcome these limitations, we resorted to a method independent of HRP and amplex  
16 red. Here, we followed the direct reaction of non-fluorescent coumarin-7-boronic acid  
17 (CBA) with H<sub>2</sub>O<sub>2</sub>, leading to the production of fluorescent 7-hydroxycoumarin (COH).<sup>90</sup>  
18 Although this reaction is slow<sup>90</sup> ( $k_{on}$  1.5 M<sup>-1</sup> s<sup>-1</sup>), the assay is linear over a much broader  
19 range of H<sub>2</sub>O<sub>2</sub>. Therefore, we quantified H<sub>2</sub>O<sub>2</sub> production during aerobic DvH-FDH2  
20 catalysis, varying formate concentration between 1 - 10K<sub>m</sub>. It amounted to 64 ± 6% and  
21 did not show significant variation when higher enzyme concentrations were used.  
22 Catalase addition eliminated the signal completely, confirming that H<sub>2</sub>O<sub>2</sub> is indeed the  
23 major product of O<sub>2</sub> reduction by DvH-FDH2 (Figure S26).

24 Next, we tried to assess superoxide (O<sub>2</sub><sup>•-</sup>) generation<sup>91</sup> by DvH-FDH2. Because  
25 addition of SOD had negligible effect on both direct quantification (Figures S25 and S26)



1 and oximetry (Figure S27), we probed the reduction of partially acetylated cytochrome *c*.  
2 The advantage of using the latter is that it is still reducible by  $O_2^{\bullet-}$  but not susceptible to  
3 interferences arising from oxidase or reductase activities when unmodified cytochrome *c*  
4 serves as the substrate.<sup>92</sup> Significant reduction was not observed, implying that  $O_2^{\bullet-}$  was  
5 not released by DvH-FDH2 (Figure S28).

6 Taken together, our results establish FOX activity of a highly pure metallo-FDH. To  
7 the best of our knowledge, this has never been demonstrated before. Based on IUPAC-  
8 IUB nomenclature, the term “*oxidase*” is reserved for enzymes, which utilize  $O_2$  as the  
9 electron acceptor. In our case, formate oxidation is coupled to  $2e^-$  reduction of  $O_2$  by  
10 DvH-FDH2, resulting in 65 to 75%  $H_2O_2$  production (reaction 3). Hence, we project that  
11 roughly 25 – 35%  $O_2$  is reduced to  $H_2O$  by a  $4e^-$  process (reaction 2). From a mechanistic  
12 perspective, this is reminiscent of how  $O_2$ -tolerance is achieved in some [NiFe]-  
13 hydrogenases (see below)<sup>93</sup>. However, given the high level of difficulty associated with  
14 detecting and quantifying  $H_2O$ , only a handful of studies have been performed on this  
15 front using redox enzymes.<sup>86, 89, 94, 95</sup>

16 **Redox Bifurcation Facilitates the Coexistence of FOX and FDH Activities:** When DvH-  
17 FDH2 couples formate oxidation to the reduction of electron acceptors other than  $O_2$ , it  
18 functions as a dehydrogenase. Our kinetic (Figure 5) and product (Figure 6) analysis  
19 illustrate that FOX activity does not interfere with the latter function. Nevertheless, it is  
20 unknown if this pattern holds when a macromolecule serves as an electron acceptor.  
21 Because our central hypothesis rests on the assumption that FOX activity is likely to  
22 preserve electron transfer to natural high potential acceptors (see Introduction), we tested  
23 it directly. Since an eleven-heme cytochrome *c* (*uhc*) is located immediately adjacent to  
24 *fdh2* in DvH<sup>57</sup>, we asked whether DvH-FDH2 reduces native equine cytochrome *c* ( $E_{m,7} =$   
25  $+260$  mV) in the presence of formate. Whereas stoichiometric reduction occurred under

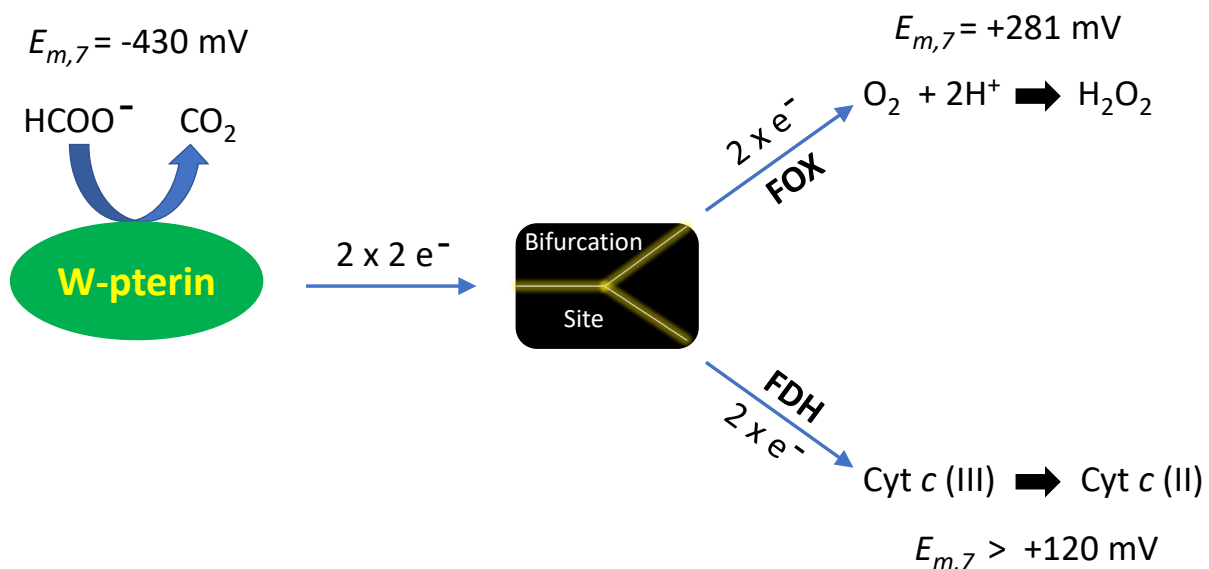

1  
2 *Figure 8. Working model of redox bifurcation by DvH-FDH2. W-pterin denotes the tungstopterin active site.*  
3 *The nature of bifurcation site (black box) is unknown. Since a multiheme cytochrome c (Cyt c) is likely the*  
4 *natural redox partner of DvH-FDH2, it is shown at the end of the bottom branch. However, its reduction*  
5 *potential is a predicted value based on our results with equine Cyt c ( $E_{m,7} = +260 \text{ mV}$ ).*

6  
7 anaerobic conditions, only ~80% underwent reduction in air (Figure 7F). However, the  
8 initial rates remained invariant (Figure S29). Doubling the formate concentration resulted  
9 in near stoichiometric reduction in air (Figure S30). Moreover, inclusion of SOD or catalase  
10 did not result in a noticeable difference (Figure S31). Under the conditions employed,  
11 dissolved  $\text{O}_2$  (257  $\mu\text{M}$ ) is at a much higher concentration than cytochrome c. Yet, electrons  
12 are readily delivered to the latter. These results prove for the first time that oxidase and  
13 dehydrogenase activities coexist within the DvH-FDH2 scaffold. We advance a non-  
14 energy-conserving electron bifurcation (EB)<sup>96</sup> mechanism to rationalize how this is  
15 accomplished (Figure 8). Here, electrons resulting from the oxidation of a  $2e^-$  donor  
16 (formate) traverse two independent thermodynamically favorable electron transfer paths

1 (FOX and FDH) to reduce two different electron acceptors ( $O_2$  and cytochrome c).  
2 Although we do not know the identity of the cofactor engaged in EB, both the  
3 tungstopterin and the proximal [4Fe-4S] cluster of the large subunit are strong candidates.  
4 Apropos, arsenite oxidase is thought to achieve EB by cycling between the Mo(VI)-dioxo  
5 and Mo(IV)-oxo states.<sup>97</sup> Whether tungsten can assume this role in DvH-FDH2 remains  
6 to be investigated. Based on our observation that superoxide was not generated during  
7 aerobic catalysis, we hypothesize that the bifurcating site likely favors normally ordered  
8 over inverted potentials.<sup>98, 99</sup> Even though the interconversion of formate to  $CO_2$  is  
9 reversible, the bifurcation events in either direction (especially  $O_2$  reduction) are  
10 potentially irreversible.<sup>100</sup> Finally, EB is thought to be the dominant source of reactive  
11 oxygen species in biological systems.<sup>100</sup> We have shown that redox metalloenzymes can  
12 capitalize on it to achieve  $O_2$  insensitivity.

13 **Molecular Basis of DvH-FDH2  $O_2$  Insensitivity.** In their phylogenetic analysis, Oliveira  
14 et al<sup>20</sup> began with over 6000 FDH sequences and reduced it by an order of magnitude in  
15 an effort to understand how the variability impacts catalytic mechanism and  $O_2$  stability.  
16 Here, we have narrowed the sequence space to just two closely related paralogs – one of  
17 these (DvH-FDH1) is unable to achieve catalysis in the presence of  $O_2$  while the other  
18 (DvH-FDH2) thrives in air. To gain atomic insights, we constructed a highly accurate  
19 heterodimeric structure of the latter using AlphaFold2.<sup>101</sup> (Figure 9A). We did not utilize  
20 preexisting structure templates to model the structure. The resulting atomic coordinates  
21 (sans cofactors) include confidence metrics (predicted Local Distance Difference Test,  
22 pLDDT) at the single residue level wherein higher scores on a scale of 1 – 100 represent  
23 greater confidence. Figure S32A shows that the heterodimeric structure of DvH-FDH2 is  
24 modeled with high confidence; bulk of the polypeptide chain displays pLDDT scores >90.  
25 Similarly, the predicted aligned error (PAE; color saturation found at any x,y coordinate in  
26 Figure S32B) is a metric of how well a residue is positioned and oriented.

1

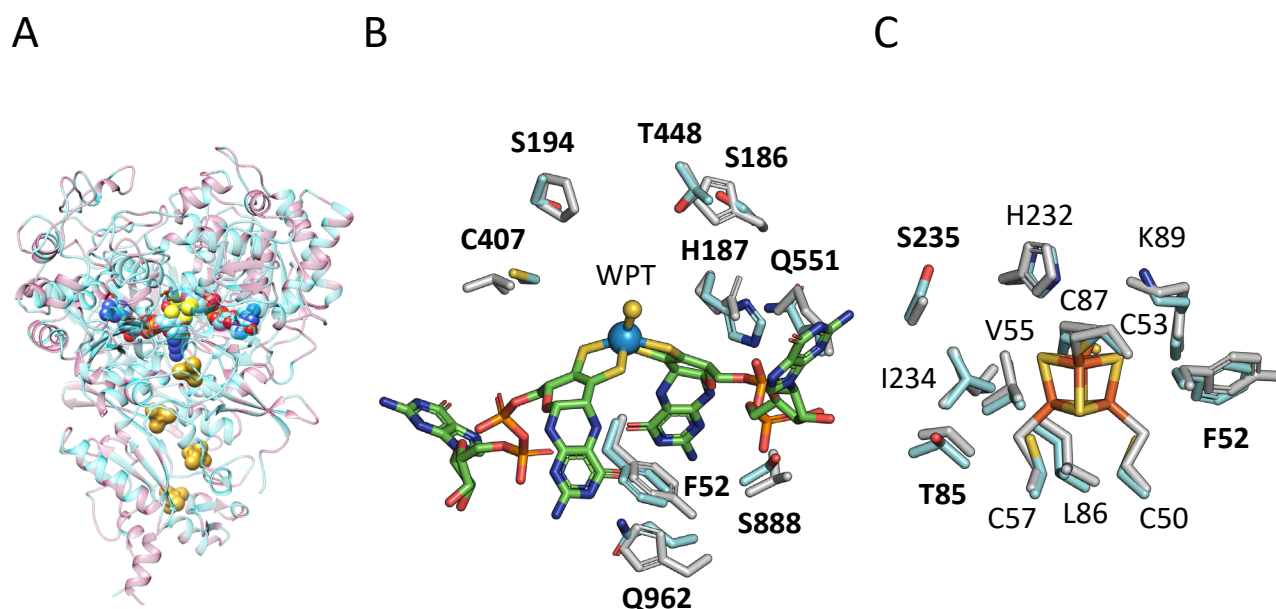

2

3 *Figure 9. Molecular insights into the O<sub>2</sub> insensitivity of DvH-FDH2. (A) AlphaFold2-based tertiary topology*  
4 *and quaternary structure. Shading in pink represents sites that are unique to FDH2. The four [4Fe-4S] clusters*  
5 *are depicted by a combination of yellow and orange spheres. The two pterin moieties coordinating a W (WPT)*  
6 *are shown at the top using blue and red spheres. (B) Variability within a 10 Å radius of W. Side chains*  
7 *belonging to DvH-FDH1 are shown in grey. W and sulfide are identified as blue and yellow spheres,*  
8 *respectively. For clarity, conserved sites are not shown (see Figure S36). (C) Environment of the large subunit*  
9 *[4Fe-4S] cluster (yellow-orange sticks). In both panels B and C bolded labels signify variations.*

10

11 Here too, very low PAE values are seen for both subunits. Independently, we predicted  
12 the structures of the two subunits and compared them with the heterodimeric  
13 counterpart. Both approaches yielded very similar results. DALI<sup>102</sup> confirms that the  
14 tertiary folds of large and small subunits are superimposable on their DvH-FDH1  
15 counterparts with a root-mean-square-deviation (RMSD) of 1.4 Å (953 Ca atoms; Z-score  
16 58.2; 61% identity) and 1.0 Å (213 C $\alpha$  atoms; Z-score 35.9; 63% identity), respectively.  
17 Backbone RMSD variations are shown in Figures S33 and S34). Similarly, the RMSD

1 between DvH-FDH1 and DvH-FDH2 heterodimers is 1.37 Å (952 C $\alpha$  atoms). After  
2 completing these validations, we computed a residue-residue (RR) distance map to  
3 identify the regions of major variation between FDH2 and FDH1 (Figure S35).

4 Although the active site residues are largely conserved between FDH2 and FDH1,  
5 there are several differences in the vicinity of the tungsten center (compare Figure 9B and  
6 S36B). Specifically, two highly conserved residues<sup>20</sup> have been substituted in FDH2. The  
7 introduction of S186 and H187 are noteworthy because they replace H187 and Q188,  
8 respectively, in FDH1. These changes are likely to influence Sec reactivity. Nonetheless,  
9 the relevance of Sec to O<sub>2</sub> insensitivity is unclear. Whereas it would be expected to confer  
10 O<sub>2</sub> tolerance,<sup>103, 104</sup> both FDH1 and FDH2 incorporate it and only the latter is capable of  
11 aerobic catalysis. Consequently, additional investigations are required to ascertain how  
12 Sec contributes differentially to stability and catalysis in enzymatic systems.

13 [4Fe-4S] clusters are prone to oxidative damage<sup>105, 106</sup> and enzymes harboring  
14 them would be expected to be inactivated by H<sub>2</sub>O<sub>2</sub> generated during aerobic catalysis.<sup>107</sup>  
15 However, this does not happen with DvH-FDH2. As a corollary, cellular experiments with  
16 *Campylobacter* group of bacteria have shown that they harbor an FDH capable of  
17 producing H<sub>2</sub>O<sub>2</sub>.<sup>108-110</sup> In these organisms, H<sub>2</sub>O<sub>2</sub> functions as a terminal electron acceptor  
18 in respiration.<sup>84, 85, 111</sup> *E. coli* capitalizes on H<sub>2</sub>O<sub>2</sub> in a similar fashion.<sup>112</sup> It is unknown  
19 whether DvH exploits this strategy. Therefore, we examined the environment of the active  
20 site proximal [4Fe-4S] cluster to glean insights. Strikingly, there are three substitutions  
21 (Y52F, S85T, A236 → S235) within a 5 Å radius (Figure 9C). This is relevant because in  
22 some O<sub>2</sub>-tolerant [Ni-Fe]-hydrogenases, introduction of a polar residue near catalytic  
23 metal clusters has been shown to improve O<sub>2</sub> resistance. Because the predicted structure  
24 of DvH-FDH2 requires us to dock the cofactors, we are unable to say more about their  
25 conformation or reactivities. Nevertheless, one or more of the following precedents may  
26 inform how O<sub>2</sub> insensitivity and / or EB evolved in our system: (1) group 1d O<sub>2</sub>-tolerant

1 [Ni-Fe]-hydrogenases, which also reduce O<sub>2</sub> to H<sub>2</sub>O<sub>2</sub> and H<sub>2</sub>O<sup>89, 113</sup>, generate an unusual  
2 [4Fe-3S] cluster; (2) a canonical [4Fe-4S] cluster in another [NiFe] hydrogenase undergoes  
3 redox-dependent structural changes,<sup>114</sup> poisoning it in a protected state until the next  
4 catalytic cycle; (3) second coordination sphere effects; and (4) local or remote  
5 conformational fluctuations at the protein level that could offer protection from attack by  
6 oxidants. Ongoing structural and biochemical studies are likely to clarify the nature of  
7 innovations at work in DvH-FDH2.

8 **Impact** The findings reported here have broad utility in disparate fields of research. (1)  
9 The current state of the art in formate/air biofuel cells is limited to mediated electron  
10 transfer because O<sub>2</sub>-sensitive metallo-FDHs need protection from redox polymer films to  
11 operate.<sup>115</sup> Consequently, a “true” formate/air BFC is yet to be fabricated. DvH-FDH2  
12 should be able to work in the absence of protective matrices and power BFCs via direct  
13 electron transfer. (2) There is no known biocatalyst that accomplishes CO<sub>2</sub> reduction in  
14 air.<sup>116</sup> And it is not possible to ground truth this reaction in a chemical environment  
15 because low-potential artificial electron donors (e.g., methyl viologen) are futile under  
16 atmospheric conditions.<sup>117</sup> Since the tungstopterin active site and other redox centers of  
17 DvH-FDH2 are O<sub>2</sub> insensitive, there is a high probability of exploiting bioelectrocatalysis  
18 to run the reverse reaction aerobically. In so far as the O<sub>2</sub>-tolerant [NiFe] hydrogenase  
19 has been successfully shown to perform aerobic bioelectrocatalysis<sup>118-120</sup> it should be  
20 possible to achieve the same for DvH-FDH2. (3) Insights gleaned from DvH-FDH2 should  
21 inform tunability of catalytic bias,<sup>121</sup> limits to electrocatalytic reversibility,<sup>122</sup> and design of  
22 biomimetic metallosynthetics.<sup>123</sup> (4) Virtually nothing is known about the redox partners  
23 of metallo-FDHs in the context of aerobic respiration.<sup>124</sup> The ability to aerially manipulate  
24 DvH-FDH2 will enable strategies for solving problems previously considered intractable  
25 in bioenergetics.

26

## 1   **METHODS**

### 2   **Genetics**

3   **Construction of *fdh* Deletion Strains** The naming schemes for the *fdh* genes follow the  
4   convention established previously<sup>56</sup>. DvH deletion strains (Table S1) were constructed  
5   using methods already described<sup>125, 126</sup>. Briefly, for the deletion of each predicted operon,  
6   two plasmids were constructed: one to create a marker-exchange deletion and another  
7   to remove the marker. Both plasmids are suicide vectors and require at least one  
8   homologous recombination event to occur to provide the selectable phenotypes. A  
9   phenotypic screen was performed to determine if a double recombination event took  
10   place, thereby increasing the likelihood of choosing isolates that had the desired  
11   genotype. Each vector contained a cloned copy of at least 300 bp upstream and a similar  
12   DNA region downstream of the operon targeted for deletion that were captured in a  
13   vector backbone containing the pUC origin of replication and a gene conferring  
14   spectinomycin-resistance. The plasmids were constructed by the sequence and ligation  
15   independent cloning (SLIC) technique<sup>127</sup> with amplicons obtained from PCR using the  
16   primers found in Table S2 (Integrated DNA Technologies, Coralville, IA) and the Herculase  
17   II DNA polymerase (Life Technologies, Grand Island, NY). For the marker-exchange  
18   plasmids, the two DNA regions up- and down-stream are separated by an artificial, two-  
19   gene operon consisting of *aph(3')-IIa* (conferring antibiotic resistance to 50 µg  
20   kanamycin/mL in *E. coli* and 400 µg G418/mL in DvH) and the counter-selectable marker  
21   uracil phosphoribosyltransferase (*upp*, DVU1025) genes. The marker-exchange plasmids  
22   were introduced by electroporation into a strain containing a deletion of the *upp* gene  
23   and the operon to be deleted. The transformed DvH cells were allowed to recover  
24   overnight at 34 °C, as previously described<sup>126</sup>. The cells were then grown for 3-5 days on  
25   solidified MOYLS4 medium<sup>128</sup> containing G418 to select for transformants. Single isolates  
26   were screened for sensitivity to 100 µg spectinomycin/mL (consistent with the double  
27   homologous recombination event), sensitivity to 40 µg 5-fluorouracil/mL (5FU<sup>S</sup>; to ensure

1 the counter-selection of 5FU resistance (5FU<sup>R</sup>) would be effective) and maintenance of  
2 resistance to G418. A putative marker-exchange deletion isolate was then chosen and  
3 transformed with the marker-less deletion plasmid, as described above. The transformed  
4 cells were recovered, plated on medium containing 5FU and the three phenotypic markers  
5 again screened. For the marker-less deletion isolates, however, isolates were selected that  
6 were 5FU-resistant and G418-sensitive showing that the marker exchange cassette had  
7 been removed from the cell by double homologous recombination. Up to three isolates  
8 with the desired antibiotic-resistance phenotype were further analyzed by Southern blot.  
9 Once confirmed, one of these isolates was chosen as the marker-less deletion mutant.

10 For operon deletions, the upstream and downstream regions, respectively,  
11 consisted of 858 bp and 806 bp (*fdh1*; DVU0586-0588), 795 bp and 878 bp (*fdh2*;  
12 DVU2485-2481), and 976 bp and 970 bp (*fdh3*; DVU2809-2812). Parental strain JW710<sup>126</sup>  
13 was used for the deletion of *fdh1* and *fdh3*. Confirmation by Southern blot was  
14 accomplished by digesting the genomic DNA of the parental and putative deletion strains  
15 with AgeI (NEB, Ipswich, MA), separating the DNA fragments by gel electrophoresis, and  
16 probing with the upstream region.

## 17 **Molecular Biology and Microbiology**

18 **Plasmid Construction** pMO9075 backbone was amplified via Phusion polymerase (New  
19 England Biolabs #E0553S) using the primers pMo9075 slic\_F and pMo9075 slic\_R,  
20 separated on 0.6% TAE (BioRad QBI 351-008-131) agarose gel (BioRad 161-3102) and  
21 purified via gel extraction (Qiagen #28704). Inserts were amplified with Phusion  
22 polymerase via standard reaction conditions. Primers 2482\_pmo\_F and 2481\_pmo\_R were  
23 used to amplify FDH2 for cloning into pMO9075. Primers 2482\_pmo\_F and 2482\_strII\_R  
24 were used to amplify DVU2482, introducing the upstream vector flank to DVU2482 and a  
25 StrepII tag to the 3'-end of DVU2482. Primers strII\_2481\_F and 2481\_pmo\_R were used to  
26 amplify DVU2481 with StrepII-tag overlap (while maintaining native intergenic spacer)  
27 and downstream vector flank. Amplicons were separated in 0.6 % TAE agarose gels and



1 purified by gel extraction. Inserts were assembled with vector backbone via overlap  
2 assembly using Gibson cloning (New England Biolabs #M5510A). Assembly reactions were  
3 used to transform *E. coli*  $\alpha$ -select chemically competent cells (Bioline BIO-85026) and  
4 colonies were selected on YT glucose plus 50 mg/mL spectinomycin HCl (Sigma-Aldrich  
5 S9007). For positive clones, 50 mL of transformant was grown in MDAG-11 formulated in  
6 house<sup>129</sup> supplemented with spectinomycin, and the plasmid was purified using a Qiagen  
7 Plasmid Midi Kit (Qiagen 12943).

8 **Bacterial growth.** DvH strains were grown on MOYLS4 medium (see Protocol S1), which  
9 was adjusted to pH 7.2 with NaOH. Thioglycolate was added before bottling and after  
10 equilibration to dinitrogen (Airgas NI NF200 or research grade). For generating inocula,  
11 media were bottled anaerobically under dinitrogen (5 psi), 50 mL per 100 mL serum bottle  
12 (Duran Wheaton Kimble 223747) with butyl rubber stopper (Chemglass CLS-4209-14) and  
13 aluminum crimp seal (Wheaton 20-0000AS). For larger volumes, glass media bottles  
14 (Pyrex 1395500, 13951L; Fisher 06-414-1C/06-41401D) were sealed with no. 6 neoprene  
15 stoppers (RPI-259100-6) and capped with media bottle lid with a center bore to access  
16 the stopper. Bottles were autoclaved and vitamins were syringed in from a filter sterilized  
17 (RPI 256131) 1X stock just before inoculation.

18 **Transformation** One of our laboratories (C.S.R.) formulated a protocol that is different  
19 from what has been reported earlier.<sup>49</sup> DvH strains were grown in 50 mL MOYLS4 in 100  
20 mL serum bottle at 37 C with nitrogen headspace to near stationary phase and chilled on  
21 ice. Cells were aerobically spun down in a 50 mL conical centrifuge tube (Corning 430828)  
22 at 7,500 x g for 5 min, then washed twice in 17 mL of ice cold 15 mM Tris pH 7.2, 10%  
23 glycerol supplemented to 1 mM with dithiothreitol. The final pellet was resuspended to 1  
24 mL in the same buffer. A 100  $\mu$ L aliquot of cells was aerobically mixed on ice with 7.5  $\mu$ L  
25 from plasmid midi prep (~2-3  $\mu$ g plasmid) and electroporated at 1.5 kV (1 mm gap  
26 cuvette; MBP #5510) in an Eppendorf electroporator 2510. 1 mL of sterile anaerobic  
27 MOYLS4 was immediately added and the entire volume was transferred to a bottle of

1 MOYLS4. The bottle was incubated at 37 C (Glascol, Micro-expression Vertiga shaker).  
2 Once the culture recovered and became densely turbid, transfers were made to fresh  
3 medium containing 100 µg/mL spectinomycin HCl. After two rounds of growth with  
4 spectinomycin selection, freezer stocks in 10% glycerol were made. For colony selection  
5 the same medium supplemented with 1.5% agar, 5 mM cysteine, 1 mM sodium sulfide,  
6 and 100 µg/mL spectinomycin was used and kept in gas tight jars with an AnaeroGen 3.5  
7 L Gas generating system pack (Oxoid). Colonies were picked into selective medium using  
8 a sterile 1 mL syringe (Becton Dickinson 309659) fitted with an 18-gauge needle.

9 **10 L carboy growth of DvH-FDH2 producing strain CSR21271** For each carboy, the  
10 strain was transferred from 10% glycerol freezer stock in MOYLS4 medium; ~0.5 mL of  
11 stock added to a 50 mL bottle of anaerobic MOYLS4 medium, supplemented with vitamins  
12 and 100 µg/mL spectinomycin hydrochloride. Transfers were made by nitrogen purged  
13 syringe with 23-gauge needles (Becton Dickison 305190). The culture was incubated  
14 overnight at 37 C or until mid-exponential phase of growth. 20 mL of the overnight culture  
15 was used to inoculate a 500 mL bottle of MOYLS4 medium, containing vitamins and 100  
16 µg/mL Spectinomycin HCl. The 500 mL culture was incubated overnight at 37 C. 10 Liters  
17 of MOYLS4 medium in 2 L bottles, prewarmed, sterile, aerobic, with iron and EDTA  
18 withheld, was poured into a sterile 10 L polypropylene carboy (Thermo 2250-0020). The  
19 medium was completed by addition of filter sterilized vitamins, spectinomycin  
20 hydrochloride (1g dissolved in 15 mL water; 100 µg/mL final) and 4.8 mL of iron chloride  
21 (125 mM; Acros 423705000) / EDTA (250 mM; Fisher BP120-1) solution. The carboy was  
22 closed and purged with nitrogen via a butyl rubber stopper port (Chemglass CLS-4209-  
23 14) affixed to the lid (Figure S37A). 5 mL of 25% sterile neutral sodium sulfide (Alfa Aesar  
24 36622) was then injected through the port and the carboy was mixed by shaking (Figure  
25 S37B). Subsequently, the carboy was incubated at 37 C until resazurin indicator turned  
26 colorless. The 500 mL culture (OD<sub>550</sub> ~0.6) was then transferred into the carboy via sterile  
27 rubber transfer line (VWR-62993-726), 18-gauge needles (Becton Dickinson 305196) and

1 under nitrogen pressure (Figure S37C). The carboy was placed in an incubator (Sanyo  
2 MCO-17A1C) at 37 C and the optical density (OD) was monitored at 550 nm (Beckman  
3 DU-800 spectrophotometer) via 1 mL samples removed from the same port. Once OD<sub>550</sub>  
4 nm plateaued, the carboy was chilled in the cold room overnight (Figure S37D) and then  
5 harvested by centrifugation at 8,000 x g (Beckman Avanti HP-26 XPI) in 1 L bottles. Cell  
6 pellets were transferred to 50 mL conical centrifuge tubes, respun (7,500 x g; Corning  
7 430828), and then froze at -80 C.

## 8 **Biochemistry**

9 **Protein Expression and Purification.** Strep-tag II DvH-FDH2 was purified from strain  
10 CSR21271 (see Table S1). Unless specified otherwise all the following steps were done at  
11 4 C and under atmospheric conditions. Nitrate, azide, thiols, or formate were not used at  
12 any step of the purification or storage. Cells (~ 18 g) were suspended in six volumes of  
13 50 mM sodium phosphate (Fluka 71505, Sigma-Aldrich S0786), pH 7.4, containing 150  
14 mM sodium chloride and 1 mL of 50 x Complete Proteinase inhibitor (Roche 45582400; 1  
15 tablet in 1 mL of MilliQ water), by gentle pipetting in cold buffer. Cells were lysed using  
16 an Avestin C3 homogenizer and cell debris spun down at 4500 x g (Beckman Avanti HP-  
17 26 XPI) for 15 min. Membrane vesicles were removed by centrifugation at 285,000 x g 1  
18 hr (Beckman Optima L100XP). The clarified lysate was then fractionated by ammonium  
19 sulfate precipitation with fractions pelleted at 10,000 x g for 10 min and the 40-70%  
20 saturating fraction was retained and exchanged via centrifugal concentrator (Amicon 30  
21 kDA molecular weight cutoff) into 100 mM Tris-HCL buffer pH 8, containing 150 mM NaCl  
22 and 1 mM EDTA. The sample was loaded on to streptactin-XT superflow resin (IBA-  
23 LifeSciences) and the column was washed with 40 volumes of the same buffer. StrepII-  
24 tagged protein was eluted by several column volumes of 100 mM Tris-HCl buffer, pH 8,  
25 containing 150 mM NaCl, 1mM EDTA, and 50 mM biotin (IBA-LifeSciences 2-1016-005).  
26 The protein was concentrated via centrifugal concentrator (Amicon 30 kDA MWCO) and  
27 exchanged into 20 mM Tris-HCl buffer pH 8.0, with or without 10% glycerol (Sigma-

1 Aldrich 49770) and stored at -80 C for future use. The protein concentration was estimated  
2 by BCA assay (Thermo Fisher) versus a BSA standard.

3 **Gel Electrophoresis** DvH-FDH2 was separated on a Nupage 4-12% Bis-Tris Gel (Thermo  
4 Fisher). The running buffer was 1x MES-SDS. The sample was loaded as 5  $\mu$ L of 12  $\mu$ M  
5 DvH-FDH2 in 62.5 mM Tris-HCl buffer, containing 1.5% SDS, 10% sucrose, 0.0075%  
6 bromphenol blue, pre-incubated at room temp (23 °C) for 30 minutes and then heated 5  
7 minutes at 50 C. The protein was run alongside Precision plus Kaleidoscope prestained  
8 standards (Bio-Rad #1610375) for 100 minutes at 100 V (Invitrogen mini gel tank A25977).  
9 The gel was fixed in 40% methanol, 10% acetic acid, stained in 30% methanol, 10% acetic  
10 acid, and 0.05% Coomassie blue G-250, and destained in 8% acetic acid. Gels were  
11 scanned with a gel doc imager (Bio-Rad).

12 **Chromogenic Visualization (In-Gel Assay).** DvH-FDH2 was separated on a standard Tris  
13 buffered 5% polyacrylamide gel, 2.6% crosslinker gel supplemented with 0.05% triton X-  
14 100 (Fisher BP151-100). The running buffer was 25 mM Tris, 192 mM glycine and 0.05%  
15 triton X-100 (v/v). Every other lane was loaded with 7.5  $\mu$ L of 3  $\mu$ M FDH2 in 20% sucrose,  
16 0.25 M Tris pH 6.9, 0.05% triton, 0.0125% bromphenol blue. Electrophoresis was  
17 conducted at 100 V for 209 minutes, 10 mA limit at 4 C. Lanes were cut into strips then  
18 assayed in 10 mL of 0.24 mg/mL NBT (Invitrogen N6495) in 20 mM Tris pH 8.0 with or  
19 without 10 mM formate (added as 100  $\mu$ L of 1 M). Strips were incubated with shaking for  
20 15 minutes and then washed with MilliQ water for 3 x 5 min, and then scanned on a Bio-  
21 Rad Gel Doc imager.

22 **NBT strip assay** 3 mm strips of chromatography paper (Whatman, 3MM CHR), cut with a  
23 paper cutter, were soaked with a solution consisting of 300  $\mu$ M NBT (1 mL of 3 mM in  
24 water) , 30  $\mu$ M PMS (Sigma P9625) (1 mL of 300  $\mu$ M in ethanol) in 8 mL Tris-buffered  
25 saline pH 7.5, with or without 10 mM formate (Aldrich 798630-500g) (100  $\mu$ L of 1 M in  
26 water). Strips were then spotted with 5  $\mu$ L of 12  $\mu$ M enzyme or control solution (buffer  
27 only) and monitored for color development. PMS was added to the NBT solutions to 30

1  $\mu\text{M}$  final from a 30 mM stock in water before soaking the strips. For the NBT only  
2 experiment, strips of Whatman chromatography paper ( $\sim 8.8 \text{ cm}^2$ ) were soaked with 140  
3  $\mu\text{L}$  of 293  $\mu\text{M}$  NBT in 20 mM Tris pH 8.0 with or without 10 mM sodium formate. FDH2  
4 was spotted onto strips as a 5  $\mu\text{L}$  drop of 12  $\mu\text{M}$  enzyme in 20 mM Tris pH 8.0.

5 **Metal analysis** Inductively coupled plasma mass spectrometry (ICP-MS; iCAP-RQ,  
6 Thermo Fisher Scientific, Bannockburn, IL) was used in the KED mode to assess the metal  
7 stoichiometry of DvH-FDH2. 25  $\mu\text{L}$  of protein samples were placed in 15 mL conical tubes  
8 followed by the addition of 200  $\mu\text{L}$  of Optima grade  $\text{HNO}_3$ . Samples were digested for 20  
9 minutes at room temperature followed by the addition of 9.775 mL of Millipore  $\text{H}_2\text{O}$  to  
10 obtain a final acid matrix of 2%  $\text{HNO}_3$  (v/v). QCS27 high-purity standards (Delta Scientific  
11 Laboratory Products) were used as a multi-element standard, as well as tungsten  
12 individual standard. The following isotopes were analyzed:  $^{56,57}\text{Fe}$ ,  $^{63,65}\text{Cu}$ ,  $^{77,78,82}\text{Se}$ ,  
13  $^{95,96,98}\text{Mo}$ , and  $^{182,183,184}\text{W}$ . All sample were run with one survey run and three main peak  
14 jumping runs.

## 15 **Enzymology**

16 **Benzyl viologen assay** In this assay BV (colorless) is one-electron reduced to BV+  
17 (purple)<sup>130, 131</sup> by DvH-FDH2. Our workflow is described in Figure S38. FDH2 was assayed  
18 in an argon (Airgas AR-300) atmosphere with 2 mM or 20 mM Benzyl viologen (Alfa Aesar  
19 H66836) in 50 mM Tris pH 8.0 with 20 mM glucose and supplemented with glucose  
20 oxidase (Sigma- G7141-50ku) 1U/mL, and catalase (Sigma C1345-G) 1  $\mu\text{g}/\text{mL}$ , in a  
21 stoppered quartz cuvette (Helma 110-10-40) fitted with a Suba seal silicone septum  
22 (Sigma Z279730-25ea) and an 8 mm x 3 mm pivoted spin bar (VWR 37119-6183). Assays  
23 were performed under argon in a UV-2600i spectrophotometer (Shimadzu Life Sciences)  
24 equipped with a T2 Peltier/stirring unit (Quantum; T = 25  $^\circ\text{C}$ ; stirring speed 650 rpm) and  
25 monitored at 557 nm. Measurements were started by the addition of 10  $\mu\text{L}$  formate or  
26 buffer blank using a 10  $\mu\text{L}$  Hamilton syringe (under an argon headspace) to a 2.5 mL  
27 reaction mix containing pre-equilibrated 1.6 nM FDH2.

1 **Phenazine Ethosulfate (PES) / Dichlorophenolindophenol (DCPIP) Assay** Here, PES  
2 reacts directly with the enzyme, gets reduced and then transfers electrons to DCPIP non-  
3 enzymatically.<sup>78</sup> Our workflows are described in Figures S39 and S40 We chose PES over  
4 PMS because of its long-term stability.<sup>132</sup> Furthermore, we took the necessary precautions  
5 in handling and preparing the reagents.<sup>133</sup> DvH-FDH2 was assayed in 1 mM PES (Sigma-  
6 Aldrich P4544-1G) / 93  $\mu$ M DCPIP (98% pure; Acros 152870100) in 50 mM Tris pH 8.0.  
7 Reactions, 2.5 mL volume, were set up to the desired formate concentration and then  
8 started by addition of 10  $\mu$ L of 400 nM FDH2 (1.6 nM final). Assays were performed using  
9 a UV-2600i spectrophotometer (Shimadzu Life Sciences) equipped with T2 Peltier/stirrer  
10 accessory (Quantum) and monitored at 600 nm. For aerobic measurements (Figure S39),  
11 reactions were performed in open top styrene disposable cuvettes (Brand 75907D) with 6  
12 mm x 9 mm cuvette stirrer (Cowie 001.1609) spun at 400 rpm, and reactions started by  
13 addition of 10  $\mu$ L of 400 nM FDH2 via micropipette. Some aerobic experiments were  
14 conducted using a Cary 300 UV-Vis spectrophotometer (Agilent) at a volume of 3.0 mL  
15 with a 9 mm x 8 mm spin bar (Sigma Z363545) cuvette stirrer. For the anaerobic  
16 conditions (Figure S40), reactions were set up under argon in screw cap quartz cuvettes  
17 (Starna 1-SOG-10\_GL14-S) sealed with Suba-Seal 13 white rubber septa (Sigma Z167258).  
18 The stirrer was an 8 mm x 3 mm pivot bar (VWR 37119-6183), stirring at 650 rpm.  
19 Reactions were started by addition of FDH2 via 10  $\mu$ L syringe (Hamilton 701N 80300)  
20 under an argon atmosphere.

21 **Data analysis** For classical steady-state kinetics, initial velocities (guided by residual plots)  
22 were obtained using ICEKAT.<sup>134</sup> KinTek Explorer<sup>75, 77</sup> (version 10.1.6, KinTek Corporation)  
23 was used to perform global fitting of enzyme kinetics data to Schemes 1 and S1. This is  
24 based on numerical integration of rate equations. Confidence contour analysis was  
25 performed to assess whether the parameters were properly constrained by the data.

26  
27

## 1 **Spectroscopy**

2 **Electronic** FDH2 spectra were collected at 23 °C in 50 mM Tris pH 8.0 using a screw cap  
3 1 cm pathlength quartz cuvette (Starna; 1-SOG\_10\_GL14s). Under aerobic conditions, the  
4 spectrum of air equilibrated enzyme was collected first. Then, 10 mM formate was added,  
5 and the spectrum was measured again. The cuvette was then capped with silicone septa  
6 (Starna GL14/SI) and 10  $\mu$ L of 2 mM of dithionite was added under argon before collecting  
7 a spectrum. For anaerobic measurements, FDH2 was gassed with argon in the sealed  
8 cuvette before addition of formate or dithionite. Reduced spectra were also measured  
9 using dithionite as the sole reductant (in the absence of formate).

10 **Electron Paramagnetic Resonance (EPR)** All samples were prepared in 20 mM Tris-HCl,  
11 pH 7.6 containing 10% glycerol (v/v). Anaerobic samples were first purged with Ar and  
12 then transferred to septum-sealed, Ar-flushed EPR tubes and reduced with either 20 mM  
13 anaerobic sodium formate or ~4 mM anaerobic sodium dithionite. Aerobic samples were  
14 reduced directly in open EPR tubes with either 20 mM sodium formate or ~2 mM sodium  
15 dithionite. All samples were subsequently frozen in a dry ice/ethanol bath, then  
16 transferred to liquid nitrogen for storage. The anaerobic sample reduced with sodium  
17 dithionite was incubated for 12 h prior to freezing.

18 EPR spectra were recorded using a Brüker EMX spectrometer operating WinEPR version  
19 4.33 acquisition software and equipped with a Bruker ER 4119HS high sensitivity X-band  
20 cavity and gaussmeter. Temperature was controlled with a Brüker variable temperature  
21 unit and a liquid nitrogen or liquid helium cryostat. For purposes of comparison, all  
22 spectra were calibrated to a microwave frequency of 9.385 GHz. Detailed instrument  
23 settings are included in the figure captions. Simulations were performed using the  
24 EasySpin 4.5.5 software package.<sup>135</sup> Simulations included a “weight” term, which was used  
25 to estimate the relative contribution of each component to the composite spectrum.

26 **Nuclear Magnetic Resonance.** NMR data were recorded on an Agilent DD2 500 MHz  
27 spectrometer equipped with a 5 mm quadruple (<sup>1</sup>H, <sup>13</sup>C, <sup>15</sup>N, <sup>31</sup>P) PFG Penta Probe, which

1 was maintained at 25 °C.  $^{13}\text{C}$  data were acquired with 70332 points with a spectral width  
2 of 30478 Hz, 242 ppm centered at 110 ppm, with proton-decoupling on throughout the  
3 experiment (1 s delay between transients and 1.15s of acquisition time) and the number  
4 of transients collected ranged from 64 to 1024. The fids were zero-filled and multiplied  
5 with a 3-Hz line-broadening function prior to Fourier-transformation; the final size of the  
6 spectrum was 65536 points. Proton data were recorded with 16384 points with a spectral  
7 width of 7530 Hz (15 ppm centered at 4.7 ppm) with pre-saturation (2 s) to suppress the  
8 water peak; 1 s delay between transients were used. Additional parameters are detailed  
9 in Figures S15 – S23. Reference spectra of  $^{13}\text{C}$ -formate (9.5 – 10.5 mM in 100 mM sodium  
10 phosphate buffer, pH 6 or 7.5) and  $^{13}\text{C}$ -sodium bicarbonate (4.8 mM in 100 mM sodium  
11 phosphate buffer, pH 6) were first collected using standard 5 mm thin-walled NMR tubes  
12 (Wilmad). 10%  $\text{D}_2\text{O}$  was used to obtain internal signal lock. Subsequently, 1.3  $\mu\text{M}$  DvH-  
13 FDH2 was added to the tube containing  $^{13}\text{C}$ -formate (pH 7.5), mixed, and spectra were  
14 recollected. Upon completion, 2 mM PES was added to the same tube, mixed, and  
15 remeasured. Independently, this process was repeated with  $^{13}\text{C}$ -formate at pH 6. NMR  
16 data were processed with MestReNova NMR suite version 14.2.1-27684.

## 17 **Quantification of $\text{O}_2$ Reduction**

18 **Oximetry** A Clark-type  $\text{O}_2$  electrode (Oxygraph Plus System from Hansatech Instruments,  
19 UK) was used to monitor changes to the dissolved  $\text{O}_2$  concentration, which corresponds  
20 to 267  $\mu\text{M}$  at 23 °C.  $\text{O}_2$  saturation under these conditions would be equivalent to 1.27  
21 mM. A decrease in  $\text{O}_2$  level would indicate that  $\text{O}_2$  was being consumed during aerobic  
22 catalysis. Conversely,  $\text{O}_2$  evolution would be diagnostic of catalase activity. The  
23 electrode was calibrated each time before use with air saturated Milli-Q water and  
24 dithionite per manufacturer's instructions. Freshly made reagent stocks and buffer  
25 solutions were used throughout. 1 mL reactions were performed at 23 °C in a closed cell  
26 using air-saturated 100 mM Tris-HCl, pH 8, containing 1 mM EDTA (Fisher BP120-1). The



1 latter was added to limit adventitious metal ions from mediating O<sub>2</sub> consumption. After  
2 obtaining a stable baseline with the buffer, 10 mM formate was added, and the baseline  
3 was allowed to stabilize. The reaction was started by the addition of 50 nM DvH-FDH2.  
4 Once the O<sub>2</sub> consumption plateaued, 2 μM catalase (Sigma C1345-G) was added.  
5 Catalase breaks down H<sub>2</sub>O<sub>2</sub> to water and dioxygen (2H<sub>2</sub>O<sub>2</sub> → 2H<sub>2</sub>O + O<sub>2</sub>) To test the effect  
6 of additives, the order of addition was changed. For example, to test whether DvH-FDH2  
7 had catalase activity, H<sub>2</sub>O<sub>2</sub> was added to buffer first, followed by the enzyme. Similarly,  
8 to assess the effect of SOD on O<sub>2</sub> uptake, SOD was the first component to be added. O<sub>2</sub>  
9 consumption rates were calculated as described before.<sup>136</sup> Initial velocities were  
10 determined from the gradients of [O<sub>2</sub>] versus time traces after subtracting O<sub>2</sub>  
11 consumption under the same experimental conditions without FDH2.

## 12 **Quantification of Hydrogen Peroxide**

13 **Amplex Red method:** 5 mg of Amplex Red (AR; Invitrogen A12222) was dissolved in  
14 0.9725 mL neat DMSO to yield a 20 mM solution. Horseradish peroxidase (HRP;  
15 Sigma P8250-5ku) was prepared at a concentration of 10 U/mL (45.5 μg/mL) in sodium  
16 phosphate pH 7.4. Prior to assay, a 2x working solution was prepared from 10.6 μL of 20  
17 mM AR, 80 μL of HRP, 1.6 μL of 0.5 M Diethylenetriaminepentaacetic acid (DTPA;  
18 TCI D0504) and 3.9 mL of 50 mM sodium phosphate pH 7.4 and kept in the dark.  
19 Production of H<sub>2</sub>O<sub>2</sub> was measured by preparing reaction mixtures in a Costar 3915 black  
20 flat bottom 96 well plate. Reactions consisted of 50 mM sodium phosphate pH 7.4, with  
21 desired amounts of sodium formate added from a 50 μM stock and initiated by addition  
22 of 5 μL of 32 nM DvH-FDH2 in the same buffer to a volume of 50 μL. This approach  
23 allowed H<sub>2</sub>O<sub>2</sub> generation to commence prior to the introduction of AR/HRP mixture.  
24 H<sub>2</sub>O<sub>2</sub> (Sigma-Aldrich H1009-100mL) standard curve was generated in the same buffer to  
25 a volume of 50 μL. Detection was initiated by addition of 50 μL of the 2x Amplex Red/HRP

1 working solution and fluorescence was scanned in top read mode at medium sensitivity  
2 on a SpectraMax M2 (Molecular Devices) plate reader (excitation 530 nm and emission  
3 590 nm) every four minutes for twelve minutes (23 °C). Independently, we assessed  
4 whether outcomes differed when order of addition was varied. To that end, in one set of  
5 assays, 5  $\mu$ L of 32 nM FDH2 was added after AR/HRP. Here, 0.5 mM DTPA was used  
6 instead of 0.1 mM.

7 **Coumarin boronic acid (CBA) assay:** 10 mg of coumarin-7-boronic acid (CBA) Cayman  
8 Chemicals 14051) was dissolved in 3.33 mL of DMSO. 101  $\mu$ L of the CBA stock and 1.6  $\mu$ L  
9 0.5 M DTPA were added to 3.9 mL 50 mM sodium phosphate pH 7.4 to produce a 2x  
10 working solution. The remaining steps essential identical to those used in the Amplex  
11 Red assay except that the plate was shaken at 400 rpm in an incubator (23 °C) for 15 min  
12 prior to CBA addition. Fluorescence detection was initiated by addition of 50  $\mu$ L of the  
13 CBA 2x working solution, and the plate was scanned in fluorescence mode (excitation 332  
14 nm and emission 470 nm).

15 The following controls were common to both assays. (1) Heat denatured DvH-FDH2, (2)  
16 Addition of catalase (100 U/mL), (3) Addition of superoxide dismutase (10 U / mL), (4)  
17 Sans FDH2, (5) Fluorogenic substrate excluded, (6) Formate excluded, and (7) Buffer alone.

18 **Superoxide Generation / Redox Bifurcation.** Native (Sigma C2506) and partially  
19 acetylated (Sigma C4186) equine heart cytochrome c were used to assess superoxide  
20 production by DvH-FDH2. The integrity of oxidized cytochrome c was validated by  
21 establishing the presence of 695 nm transition. The reduction of 30  $\mu$ M (native) or 60  $\mu$ M  
22 (partially acetylated) cytochrome c by DvH-FDH2 was followed at 550 nm in a 1 cm  
23 pathlength cell (Shimadzu UV-2600i spectrophotometer). We used two-fold higher  
24 concentration of acetylated cytochrome c to offset its slightly weaker reactivity with  
25 superoxide.<sup>92</sup> The reaction mix (total volume 2.5 mL) was stirred (Cowie 001.1609) at 300  
26 rpm (Quantum T2/Peltier unit) and maintained at 25 °C. For aerobic experiments, open  
27 top styrene disposable cuvettes (Brand 75907D) were used. For anaerobic measurements

1 under argon, screw cap quartz cuvettes (Starna 1-SOG-10\_GL14-S) sealed with Suba-Seal  
2 13 white rubber septa (Sigma Z167258) were used. To 50 mM Tris-HCl buffer, pH 8,  
3 containing cytochrome c, enzyme (1.6 nM final) was added first to obtain the background  
4 signal. Subsequently, 10  $\mu$ M formate was added to start the reaction. Upon completion,  
5 ~ 2 mM dithionite was spiked into the mix to estimate the amount of remaining oxidized  
6 protein. Controls devoid of formate, enzyme, and cytochrome c were also employed.  
7 The effect of superoxide dismutase (10 – 100 U / mL) or catalase (100 – 400 U / mL) was  
8 tested independently.

### 9 **Structural analysis**

10 Protein alignments were constructed using MUSCLE or MAFFT. Structural alignments  
11 were performed using Chimera v1.16. Amino acid sequences of the large (DVU2482) and  
12 small (DVU2481) subunits of DvH-FDH2 were input together for running structure  
13 predictions using a modified version of AlphaFold2.1.<sup>101</sup> Because this algorithm does not  
14 recognize Sec, a Cys was substituted and that Tat signal peptide (see Fig. 3A) was not  
15 included. A dedicated Google Colab notebook ([AlphaFold.ipynb-Colaboratory](#)  
16 [\(google.com\)](#)), which does not utilize homologous structures for making predictions was  
17 used with default settings. We also independently predicted the structures of DVU2482  
18 and DVU2481 using a full version of AlphaFold2.1. The resulting heterodimeric structures  
19 were superposed on the DvH-FDH1 counterpart determined via X-ray crystallography  
20 (PDB ID: 6SDV<sup>20</sup>) to assess similarities and differences. Difference distance matrices were  
21 computed using Chimera v1.16. Structure visualizations and manipulations were done via  
22 Pymol.

23  
24  
25  
26  
27

## 1 **AUTHOR INFORMATION**

### 2 **Corresponding Author**

3 C. S. Raman \*E-mail: [ramancs@gmail.com](mailto:ramancs@gmail.com)

### 4 **ORCID**

5 Joel E. Graham [orcid.org/0000-0001-6421-9405](https://orcid.org/0000-0001-6421-9405)

6 Grant M. Zane [orcid.org/0000-0002-3357-3097](https://orcid.org/0000-0002-3357-3097)

7 C. S. Raman [orcid.org/0000-0002-1036-3193](https://orcid.org/0000-0002-1036-3193)

### 8 **Author Contributions**

9 C.S.R. conceived the work, designed the experiments, acquired funding, and directed the  
10 project. J.E.G. created new DvH strains (identified by the CSR prefix in Table S1),  
11 established a novel scaleup strategy and streamlined workflow for generating DvH  
12 biomass, optimized DvH transformation protocol, developed a DvH expression platform  
13 (cloning, homologous expression, and purification), characterized DvH-FDH2 via  
14 electronic spectroscopy, demonstrated in-gel activity, measured enzyme kinetics data,  
15 confirmed cytochrome *c* reduction, and validated formate oxidase activity under the  
16 supervision of C.S.R. Oximetric measurements were made by C.S.R. and J.E.G. D.N.  
17 performed EPR measurements and interpreted the results under the supervision of R.H.  
18 DvH deletion strains (with a JW prefix in Table S1) were generated by Q.G., and G.M.Z.  
19 measured their growth characteristics under the supervision of J.W. K.H. acquired NMR  
20 spectra. C.S.R. analyzed data from enzyme kinetics, oximetry, and NMR, ran the AlphaFold  
21 predictions and interpreted the structural differences, and wrote the manuscript. All  
22 authors have given approval to the final version of the manuscript.

### 23 **Notes**

24 The authors declare the following competing financial interest(s): C.S.R. and J.E.G. are  
25 inventors on a patent application related to this work filed by the University of Maryland  
26 Baltimore. The authors declare no other competing interests.

27

## 1 **Associated Content**

### 2 Supporting Information

3 Strains and plasmids (Table S1), Primers (Table S2), Growth curves of JW2111 and JW2121  
4 (Figure S1), NBT strip assay (Figure S2), Sequence alignment of DvH-FD2 and DvH-FDH1  
5 (Figure S3), ICP-MS quantification of metals in DvH-FDH2 (Table S3), Comparison of  
6 electronic spectra of DvH-FDH2 and DvH-FDH1 (Figure S4), Simulation of Fe/S centers of  
7 formate-reduced DvH-Fdh2 prepared under aerobic conditions (Figure S5), EPR  
8 parameters of DvH-FDH2 (Table S4), Steady-state kinetic parameters of SRB-FDHs  
9 compiled from the literature (Table S5), Minimal catalytic model used to assess BV kinetics  
10 (Scheme S1), Ground truthing published enzyme kinetics data of Dd-FDH3 (Figure S6) and  
11 DvH-FDH1 (Figure S7), Steady state kinetics of DvH-FDH2 (Table S6), 2 mM BV reduction  
12 by DvH-FDH2 (Figure S8), 20 mM BV reduction by DvH-FDH2 (Figure S9), GO and catalase  
13 do not affect the kinetics of BV reduction by DvH-FDH2 (Figure S10), Optimizing DCPIP  
14 and PES for aerobic enzyme kinetics (Figure S11), Reduction of PES/DCPIP by DvH-FDH2  
15 in air (Figure S12), Anaerobic reduction of PES/DCPIP by DvH-FDH2 (Figure S13), Effect of  
16 azide on the reduction of PES/DCPIP (Figure S14), Effect of nitrate on the reduction of  
17 PES/DCPIP (Figure S15),  $^{13}\text{C}$  NMR spectra of  $^{13}\text{C}$ -formate + DvH-FDH2 (pH 7.5) (Figure  
18 S16),  $^{13}\text{C}$  NMR spectra of  $^{13}\text{C}$ -formate + DvH-FDH2 + PES (pH 7.5) (Figure S17),  $^{13}\text{C}$  NMR  
19 spectra of  $^{13}\text{C}$ -formate + DvH-FDH2 (pH 6) (Figure S18),  $^{13}\text{C}$  NMR spectra of  $^{13}\text{C}$ -formate  
20 + DvH-FDH2 + PES (pH 6) (Figure S19),  $^{13}\text{C}$  NMR spectra of  $^{13}\text{C}$ - $\text{NaHCO}_3$  (pH 6) (Figure  
21 S20),  $^{13}\text{C}$  NMR spectra of  $^{13}\text{C}$ -formate (pH 6) (Figure S21),  $^{13}\text{C}$  NMR spectra of  $^{13}\text{C}$ -formate  
22 (pH 7.5) (Figure S22),  $^1\text{H}$  NMR spectra of  $^{13}\text{C}$ -formate (pH 6) (Figure S23), DvH-FDH2 lacks  
23 catalase activity (Figure S24), Assessing the effect of variables on amplex red assay (Figure  
24 S25), Evaluating how variables impact the CBA assay (Figure S26),  $\text{O}_2$  uptake by DvH-  
25 FDH2 is not impacted by SOD addition (Figure S27), Acetylated cytochrome c is not

1 reduced during aerobic FDH2 catalysis (Figure S28), Initial rates of native cytochrome c  
2 reduction is unaffected under aerobic and anaerobic conditions (Figure S29), Spectra of  
3 native cytochrome c reduced by FDH2 (Figure S30), Lack of effect of SOD and catalase on  
4 the aerobic reduction of equine cytochrome c by DvH-FDH2 (Figure S31), Confidence  
5 metrics of AlphaFold2.1 prediction (Figure S32), Variation in backbone RMSD (Figures S33  
6 and S34), Residue-residue distance map (Figure S35), Active site of DvH-FDH2 (Figure  
7 S36), MOYLS4 medium recipe (Protocol S1), DvH growth in 10 L carboy (Figure S37), BV  
8 assay workflow (Figure S38), Aerobic PES/DCPIP assay workflow (Figure S39), and  
9 Anaerobic PES/DCPIP assay workflow (Figure S40), and TOC Graphic (OutFoxing Oxygen  
10 via Redox Bifurcation)

11 This information is available free of charge on the ACS Publications website.

## 12 **ACKNOWLEDGMENTS**

13 This work is supported by the U.S. Department of Energy (DOE), Office of Science, Basic  
14 Energy Sciences (BES) under award # DE-SC-0018047 (C.S.R.). EPR measurements  
15 conducted at the University of California Riverside is supported by the DOE, Office of  
16 Science, BES under award # DE-SC0010666 (R.H.). C.S.R. is grateful to the late Jane Gibson  
17 (née Pinsent) for graciously sharing the early history of FDH and for her constant  
18 encouragement to pursue “unusual bioenergetics of bacteria”. C.S.R. thanks David A.  
19 Grahame and Luisa Maia for helpful discussions regarding FDH enzymology, Jon Hosler  
20 for insights into oximetric data analysis, Clive Bagshaw for stimulating exchanges on  
21 fitting by simulation, Luisa Maia, Ana Rita Oliveira, and Inês Pereira for generously sharing  
22 source data from their respective publications, Keith MacRenaris (ThermoFisher Scientific)  
23 and Bert Woods (Agilent) for help with ICP-MS measurements, Angela Wilks for the use  
24 of Cary-300 spectrophotometer, and Norman Brach, Jonathan Soffer and Gilbert Vial  
25 (Shimadzu Corporation, Columbia, MD) for timely assistance with the UV-2600i system.

26

## 1 REFERENCES

- 2 (1) Pinske, C.; Sawers, R. G., Anaerobic Formate and Hydrogen Metabolism. *EcoSal Plus*  
3 **2016**, 7.
- 4 (2) Hughes, E. R.; Winter, M. G.; Duerkop, B. A.; Spiga, L.; Furtado de Carvalho, T.; Zhu,  
5 W.; Gillis, C. C.; Buttner, L.; Smoot, M. P.; Behrendt, C. L.; Cherry, S.; Santos, R. L.; Hooper,  
6 L. V.; Winter, S. E., Microbial Respiration and Formate Oxidation as Metabolic Signatures of  
7 Inflammation-Associated Dysbiosis. *Cell Host Microbe* **2017**, 21, 208-219.
- 8 (3) FEEDAP, Scientific opinion on the safety and efficacy of formic acid when used as a  
9 technological additive for all animal species. *EFSA J.* **2014**, 12, 3827.
- 10 (4) Yishai, O.; Lindner, S. N.; Gonzalez de la Cruz, J.; Tenenboim, H.; Bar-Even, A., The  
11 formate bio-economy. *Curr Opin Chem Biol* **2016**, 35, 1-9.
- 12 (5) Du, D.; Lan, R.; Humphreys, J.; Tao, S., Progress in inorganic cathode catalysts for  
13 electrochemical conversion of carbon dioxide into formate or formic acid. *J. Appl. Electrochem.*  
14 **2017**, 47, 661-678.
- 15 (6) Roden, E. E.; Jin, Q., Thermodynamics of microbial growth coupled to metabolism of  
16 glucose, ethanol, short-chain organic acids, and hydrogen. *Appl Environ Microbiol* **2011**, 77,  
17 1907-9.
- 18 (7) Windman, T.; Zolotova, N.; Schwandner, F.; Shock, E. L., Formate as an energy source  
19 for microbial metabolism in chemosynthetic zones of hydrothermal ecosystems. *Astrobiology*  
20 **2007**, 7, 873-90.
- 21 (8) Crable, B. R.; Plugge, C. M.; McInerney, M. J.; Stams, A. J., Formate formation and  
22 formate conversion in biological fuels production. *Enzyme Res* **2011**, 2011, 532536.
- 23 (9) Sawers, G., The hydrogenases and formate dehydrogenases of *Escherichia coli*. *Antonie*  
24 *Van Leeuwenhoek* **1994**, 66, 57-88.
- 25 (10) Maia, L. B.; Moura, I.; Moura, J. J. G., Carbon Dioxide Utilisation - The Formate Route.  
26 In *Enzymes for Solving Humankind's Problems: Natural and Artificial Systems in Health,*  
27 *Agriculture, Environment, and Energy*, Moura, J. J. G.; Moura, I.; Maia, L. B., Eds. Springer  
28 Nature: Switzerland, 2021; pp 29-80.
- 29 (11) Niks, D.; Hille, R., Molybdenum- and tungsten-containing formate dehydrogenases and  
30 formylmethanofuran dehydrogenases: Structure, mechanism, and cofactor insertion. *Protein Sci*  
31 **2019**, 28, 111-122.
- 32 (12) Boyington, J. C.; Gladyshev, V. N.; Khangulov, S. V.; Stadtman, T. C.; Sun, P. D.,  
33 Crystal structure of formate dehydrogenase H: catalysis involving Mo, molybdopterin,  
34 selenocysteine, and an Fe<sub>4</sub>S<sub>4</sub> cluster. *Science* **1997**, 275, 1305-8.
- 35 (13) Niks, D.; Hille, R., Reductive activation of CO<sub>2</sub> by formate dehydrogenases. *Methods*  
36 *Enzymol* **2018**, 613, 277-295.
- 37 (14) Sebban, C.; Blanchard, L.; Bruschi, M.; Guerlesquin, F., Purification and characterization  
38 of the formate dehydrogenase from *Desulfovibrio vulgaris* Hildenborough. *FEMS Microbiol Lett*  
39 **1995**, 133, 143-9.
- 40 (15) ElAntak, L.; Dolla, A.; Durand, M. C.; Bianco, P.; Guerlesquin, F., Role of the  
41 tetrahemic subunit in *Desulfovibrio vulgaris* hildenborough formate dehydrogenase.  
42 *Biochemistry* **2005**, 44, 14828-34.
- 43 (16) Costa, C.; Teixeira, M.; LeGall, J.; Moura, J. J. G.; Moura, I., Formate dehydrogenase  
44 from *Desulfovibrio desulfuricans* ATCC 27774: isolation and spectroscopic characterization of

- 1 the active sites (heme, iron-sulfur centers and molybdenum). *JBIC Journal of Biological*  
2 *Inorganic Chemistry* **1997**, *2*, 198-208.
- 3 (17) Maia, L. B.; Fonseca, L.; Moura, I.; Moura, J. J., Reduction of Carbon Dioxide by a  
4 Molybdenum-Containing Formate Dehydrogenase: A Kinetic and Mechanistic Study. *J Am*  
5 *Chem Soc* **2016**, *138*, 8834-46.
- 6 (18) Riederer-Henderson, M. A.; Peck, H. D., In Vitro Requirements for Formate  
7 Dehydrogenase Activity from *Desulfovibrio*. *Can J Microbiol* **1986**, *32*, 425-429.
- 8 (19) Almendra, M. J.; Brondino, C. D.; Gavel, O.; Pereira, A. S.; Tavares, P.; Bursakov, S.;  
9 Duarte, R.; Caldeira, J.; Moura, J. J.; Moura, I., Purification and characterization of a tungsten-  
10 containing formate dehydrogenase from *Desulfovibrio gigas*. *Biochemistry* **1999**, *38*, 16366-72.
- 11 (20) Oliveira, A. R.; Mota, C.; Mourato, C.; Domingos, R. M.; Santos, M. F. A.; Gesto, D.;  
12 Guigliarelli, B.; Santos-Silva, T.; Romão, M. J.; Cardoso Pereira, I. A., Toward the Mechanistic  
13 Understanding of Enzymatic CO<sub>2</sub> Reduction. *ACS Catalysis* **2020**, *10*, 3844-3856.
- 14 (21) Rivas, M. G.; Gonzalez, P. J.; Brondino, C. D.; Moura, J. J.; Moura, I., EPR  
15 characterization of the molybdenum(V) forms of formate dehydrogenase from *Desulfovibrio*  
16 *desulfuricans* ATCC 27774 upon formate reduction. *J Inorg Biochem* **2007**, *101*, 1617-22.
- 17 (22) Axley, M. J.; Grahame, D. A.; Stadtman, T. C., *Escherichia coli* formate-hydrogen lyase.  
18 Purification and properties of the selenium-dependent formate dehydrogenase component. *J Biol*  
19 *Chem* **1990**, *265*, 18213-8.
- 20 (23) Khangulov, S. V.; Gladyshev, V. N.; Dismukes, G. C.; Stadtman, T. C., Selenium-  
21 containing formate dehydrogenase H from *Escherichia coli*: a molybdopterin enzyme that  
22 catalyzes formate oxidation without oxygen transfer. *Biochemistry* **1998**, *37*, 3518-28.
- 23 (24) Friedebold, J.; Bowien, B., Physiological and biochemical characterization of the soluble  
24 formate dehydrogenase, a molybdoenzyme from *Alcaligenes eutrophus*. *J Bacteriol* **1993**, *175*,  
25 4719-28.
- 26 (25) Yu, X.; Niks, D.; Mulchandani, A.; Hille, R., Efficient reduction of CO<sub>2</sub> by the  
27 molybdenum-containing formate dehydrogenase from *Cupriavidus necator* (*Ralstonia eutropha*).  
28 *J Biol Chem* **2017**, *292*, 16872-16879.
- 29 (26) Scherer, P. A.; Thauer, R. K., Purification and properties of reduced ferredoxin: CO<sub>2</sub>  
30 oxidoreductase from *Clostridium pasteurianum*, a molybdenum iron-sulfur-protein. *Eur J*  
31 *Biochem* **1978**, *85*, 125-35.
- 32 (27) Kroger, A.; Winkler, E.; Innerhofer, A.; Hackenberg, H.; Schagger, H., The formate  
33 dehydrogenase involved in electron transport from formate to fumarate in *Vibrio succinogenes*.  
34 *Eur J Biochem* **1979**, *94*, 465-75.
- 35 (28) Hartmann, T.; Leimkuhler, S., The oxygen-tolerant and NAD<sup>+</sup>-dependent formate  
36 dehydrogenase from *Rhodobacter capsulatus* is able to catalyze the reduction of CO<sub>2</sub> to formate.  
37 *FEBS J* **2013**, *280*, 6083-96.
- 38 (29) Stickland, L. H., The bacterial decomposition of formic acid. *Biochem J* **1929**, *23*, 1187-  
39 98.
- 40 (30) Stephenson, M.; Stickland, L. H., Hydrogenlyases: Bacterial enzymes liberating  
41 molecular hydrogen. *Biochem J* **1932**, *26*, 712-24.
- 42 (31) Gale, E. F., Formic dehydrogenase of *Bacterium coli*: its inactivation by oxygen and its  
43 protection in the bacterial cell. *Biochem J* **1939**, *33*, 1012-27.
- 44 (32) Pinsent, J., The need for selenite and molybdate in the formation of formic  
45 dehydrogenase by members of the coli-aerogenes group of bacteria. *Biochem J* **1954**, *57*, 10-6.



- 1 (33) Itagaki, E.; Fujita, T.; Sato, R., Solubilization and properties of formate dehydrogenase  
2 and cytochrome b1 from *Escherichia coli*. *J. Biochem.* **1962**, *52*, 131-141.
- 3 (34) Linnane, A. W.; Wrigley, C. W., Fragmentation of the Electron Transport Chain of  
4 *Escherichia Coli*. Preparation of a Soluble Formate Dehydrogenase-Cytochrome B1 Complex.  
5 *Biochim Biophys Acta* **1963**, *77*, 408-18.
- 6 (35) Gray, C. T.; Gest, H., Biological Formation of Molecular Hydrogen. *Science* **1965**, *148*,  
7 186-92.
- 8 (36) Ruiz-Herrera, J.; Alvarez, A., A physiological study of formate dehydrogenase, formate  
9 oxidase, and hydrogenlyase from *Escherichia coli* K-12. *Antonie Van Leeuwenhoek* **1972**, *38*,  
10 479-491.
- 11 (37) Ljungdahl, L. G., Formate Dehydrogenases: Role of Molybdenum, Tungsten, and  
12 Selenium. In *Molybdenum and Molybdenum-Containing Enzymes*, Coughlan, M. P., Ed.  
13 Pergamon: New York, 1980; pp 463-486.
- 14 (38) Pichinoty, F., Recherche des activités formiate-oxydase, hydrogène-lyase, hydrogénase et  
15 formiate-déshydrogénase chez quelques enterobacteriaceae. *Ann Inst Pasteur (Paris)* **1969**, *117*,  
16 3-15.
- 17 (39) Stewart, V., Nitrate respiration in relation to facultative metabolism in enterobacteria.  
18 *Microbiol Rev* **1988**, *52*, 190-232.
- 19 (40) Finney, A. J.; Sargent, F., Formate hydrogenlyase: A group 4 [NiFe]-hydrogenase in  
20 tandem with a formate dehydrogenase. *Adv Microb Physiol* **2019**, *74*, 465-486.
- 21 (41) Sawers, G.; Heider, J.; Zehelein, E.; Bock, A., Expression and operon structure of the sel  
22 genes of *Escherichia coli* and identification of a third selenium-containing formate  
23 dehydrogenase isoenzyme. *J Bacteriol* **1991**, *173*, 4983-93.
- 24 (42) Soboh, B.; Pinske, C.; Kuhns, M.; Waclawek, M.; Ihling, C.; Trchounian, K.;  
25 Trchounian, A.; Sinz, A.; Sawers, G., The respiratory molybdo-selenoprotein formate  
26 dehydrogenases of *Escherichia coli* have hydrogen: benzyl viologen oxidoreductase activity.  
27 *BMC Microbiol* **2011**, *11*, 173.
- 28 (43) Abaibou, H.; Pommier, J.; Benoit, S.; Giordano, G.; Mandrand-Berthelot, M. A.,  
29 Expression and characterization of the *Escherichia coli* fdo locus and a possible physiological  
30 role for aerobic formate dehydrogenase. *J Bacteriol* **1995**, *177*, 7141-9.
- 31 (44) Benoit, S.; Abaibou, H.; Mandrand-Berthelot, M. A., Topological analysis of the aerobic  
32 membrane-bound formate dehydrogenase of *Escherichia coli*. *J Bacteriol* **1998**, *180*, 6625-34.
- 33 (45) Uden, G.; Steinmetz, P. A.; Degreif-Dunnwald, P., The Aerobic and Anaerobic  
34 Respiratory Chain of *Escherichia coli* and *Salmonella enterica*: Enzymes and Energetics. *EcoSal*  
35 *Plus* **2014**, *6*.
- 36 (46) Richardson, D.; Sawers, G., Structural biology. PMF through the redox loop. *Science*  
37 **2002**, *295*, 1842-3.
- 38 (47) Yagi, T., Formate: cytochrome oxidoreductase of *Desulfovibrio vulgaris*. *J Biochem*  
39 **1969**, *66*, 473-8.
- 40 (48) Yagi, T., Monoheme cytochromes. *Methods Enzymol* **1994**, *243*, 104-18.
- 41 (49) Keller, K. L.; Wall, J. D.; Chhabra, S., Methods for engineering sulfate reducing bacteria  
42 of the genus *Desulfovibrio*. *Methods Enzymol* **2011**, *497*, 503-17.
- 43 (50) Rabus, R.; Venceslau, S. S.; Wohlbrand, L.; Voordouw, G.; Wall, J. D.; Pereira, I. A., A  
44 Post-Genomic View of the Ecophysiology, Catabolism and Biotechnological Relevance of  
45 Sulphate-Reducing Prokaryotes. *Adv Microb Physiol* **2015**, *66*, 55-321.

- 1 (51) Price, M. N.; Wetmore, K. M.; Waters, R. J.; Callaghan, M.; Ray, J.; Liu, H.; Kuehl, J.  
2 V.; Melnyk, R. A.; Lamson, J. S.; Suh, Y.; Carlson, H. K.; Esquivel, Z.; Sadeeshkumar, H.;  
3 Chakraborty, R.; Zane, G. M.; Rubin, B. E.; Wall, J. D.; Visel, A.; Bristow, J.; Blow, M. J.;  
4 Arkin, A. P.; Deutschbauer, A. M., Mutant phenotypes for thousands of bacterial genes of  
5 unknown function. *Nature* **2018**, *557*, 503-509.
- 6 (52) Verhagen, M. F.; Wolbert, R. B.; Hagen, W. R., Cytochrome c553 from *Desulfovibrio*  
7 *vulgaris* (Hildenborough). Electrochemical properties and electron transfer with hydrogenase.  
8 *Eur J Biochem* **1994**, *221*, 821-9.
- 9 (53) Lefevre, C. T.; Howse, P. A.; Schmidt, M. L.; Sabaty, M.; Menguy, N.; Luther, G. W.,  
10 3rd; Bazylinski, D. A., Growth of magnetotactic sulfate-reducing bacteria in oxygen  
11 concentration gradient medium. *Environ Microbiol Rep* **2016**, *8*, 1003-1015.
- 12 (54) Schoeffler, M.; Gaudin, A. L.; Ramel, F.; Valette, O.; Denis, Y.; Hania, W. B.; Hirschler-  
13 Rea, A.; Dolla, A., Growth of an anaerobic sulfate-reducing bacterium sustained by oxygen  
14 respiratory energy conservation after O<sub>2</sub> -driven experimental evolution. *Environ Microbiol*  
15 **2019**, *21*, 360-373.
- 16 (55) Muyzer, G.; Stams, A. J., The ecology and biotechnology of sulphate-reducing bacteria.  
17 *Nat Rev Microbiol* **2008**, *6*, 441-54.
- 18 (56) da Silva, S. M.; Pimentel, C.; Valente, F. M.; Rodrigues-Pousada, C.; Pereira, I. A.,  
19 Tungsten and molybdenum regulation of formate dehydrogenase expression in *Desulfovibrio*  
20 *vulgaris* Hildenborough. *J Bacteriol* **2011**, *193*, 2909-16.
- 21 (57) Heidelberg, J. F.; Seshadri, R.; Haveman, S. A.; Hemme, C. L.; Paulsen, I. T.; Kolonay,  
22 J. F.; Eisen, J. A.; Ward, N.; Methe, B.; Brinkac, L. M.; Daugherty, S. C.; Deboy, R. T.; Dodson,  
23 R. J.; Durkin, A. S.; Madupu, R.; Nelson, W. C.; Sullivan, S. A.; Fouts, D.; Haft, D. H.;  
24 Selengut, J.; Peterson, J. D.; Davidsen, T. M.; Zafar, N.; Zhou, L.; Radune, D.; Dimitrov, G.;  
25 Hance, M.; Tran, K.; Khouri, H.; Gill, J.; Utterback, T. R.; Feldblyum, T. V.; Wall, J. D.;  
26 Voordouw, G.; Fraser, C. M., The genome sequence of the anaerobic, sulfate-reducing bacterium  
27 *Desulfovibrio vulgaris* Hildenborough. *Nat Biotechnol* **2004**, *22*, 554-9.
- 28 (58) Lopez, S.; Prieto, M.; Dijkstra, J.; Dhanoa, M. S.; France, J., Statistical evaluation of  
29 mathematical models for microbial growth. *Int J Food Microbiol* **2004**, *96*, 289-300.
- 30 (59) de Bok, F. A.; Roze, E. H.; Stams, A. J., Hydrogenases and formate dehydrogenases of  
31 *Syntrophobacter fumaroxidans*. *Antonie Van Leeuwenhoek* **2002**, *81*, 283-91.
- 32 (60) Hartwig, S.; Pinske, C.; Sawers, R. G., Chromogenic assessment of the three molybdo-  
33 selenoprotein formate dehydrogenases in *Escherichia coli*. *Biochem Biophys Rep* **2015**, *1*, 62-67.
- 34 (61) Enoch, H. G.; Lester, R. L., The purification and properties of formate dehydrogenase  
35 and nitrate reductase from *Escherichia coli*. *J Biol Chem* **1975**, *250*, 6693-705.
- 36 (62) Pinske, C.; Jaroschinsky, M.; Sargent, F.; Sawers, G., Zymographic differentiation of  
37 [NiFe]-hydrogenases 1, 2 and 3 of *Escherichia coli* K-12. *BMC Microbiol* **2012**, *12*, 134.
- 38 (63) Schafer, C.; Friedrich, B.; Lenz, O., Novel, oxygen-insensitive group 5 [NiFe]-  
39 hydrogenase in *Ralstonia eutropha*. *Appl Environ Microbiol* **2013**, *79*, 5137-45.
- 40 (64) Hagen, W. R., Tungsten-Containing Enzymes. In *Molybdenum and Tungsten Enzymes:*  
41 *Biochemistry*, Hille, R., Schulzke, C., Kirk, M.L., Ed. The Royal Society of Chemistry:  
42 Cambridge, 2017; pp 313-342.
- 43 (65) Gladyshev, V. N.; Boyington, J. C.; Khangulov, S. V.; Grahame, D. A.; Stadtman, T. C.;  
44 Sun, P. D., Characterization of crystalline formate dehydrogenase H from *Escherichia coli*.  
45 Stabilization, EPR spectroscopy, and preliminary crystallographic analysis. *J Biol Chem* **1996**,  
46 *271*, 8095-100.

- 1 (66) Orme-Johnson, W. H., Iron-sulfur proteins: structure and function. *Annu Rev Biochem*  
2 **1973**, *42*, 159-204.
- 3 (67) Sweeney, W. V.; Rabinowitz, J. C., Proteins containing 4Fe-4S clusters: an overview.  
4 *Annu Rev Biochem* **1980**, *49*, 139-61.
- 5 (68) Raaijmakers, H.; Teixeira, S.; Dias, J. M.; Almendra, M. J.; Brondino, C. D.; Moura, I.;  
6 Moura, J. J.; Romao, M. J., Tungsten-containing formate dehydrogenase from *Desulfovibrio*  
7 *gigas*: metal identification and preliminary structural data by multi-wavelength crystallography. *J*  
8 *Biol Inorg Chem* **2001**, *6*, 398-404.
- 9 (69) de Bok, F. A.; Hagedoorn, P. L.; Silva, P. J.; Hagen, W. R.; Schiltz, E.; Fritsche, K.;  
10 Stams, A. J., Two W-containing formate dehydrogenases (CO<sub>2</sub>-reductases) involved in  
11 syntrophic propionate oxidation by *Syntrophobacter fumaroxidans*. *Eur J Biochem* **2003**, *270*,  
12 2476-85.
- 13 (70) Koehler, B. P.; Mukund, S.; Conover, R. C.; Dhawan, I. K.; Roy, R.; Adams, M. W.;  
14 Johnson, M. K., Spectroscopic characterization of the tungsten and iron centers in aldehyde  
15 ferredoxin oxidoreductases from two hyperthermophilic archaea. *J Am Chem Soc* **1996**, *118*,  
16 12391-12405.
- 17 (71) Bassegoda, A.; Madden, C.; Wakerley, D. W.; Reisner, E.; Hirst, J., Reversible  
18 interconversion of CO<sub>2</sub> and formate by a molybdenum-containing formate dehydrogenase. *J Am*  
19 *Chem Soc* **2014**, *136*, 15473-6.
- 20 (72) Silveira, C. M.; Besson, S.; Moura, I.; Moura, J. J.; Almeida, M. G., Measuring the  
21 cytochrome C nitrite reductase activity-practical considerations on the enzyme assays. *Bioinorg*  
22 *Chem Appl* **2010**.
- 23 (73) Duggleby, R. G.; Clarke, R. B., Experimental designs for estimating the parameters of the  
24 Michaelis-Menten equation from progress curves of enzyme-catalyzed reactions. *Biochim*  
25 *Biophys Acta* **1991**, *1080*, 231-6.
- 26 (74) Schweins, T.; Geyer, M.; Scheffzek, K.; Warshel, A.; Kalbitzer, H. R.; Wittinghofer, A.,  
27 Substrate-assisted catalysis as a mechanism for GTP hydrolysis of p21ras and other GTP-binding  
28 proteins. *Nat Struct Biol* **1995**, *2*, 36-44.
- 29 (75) Johnson, K. A., Fitting enzyme kinetic data with KinTek Global Kinetic Explorer.  
30 *Methods Enzymol* **2009**, *467*, 601-626.
- 31 (76) Stroberg, W.; Schnell, S., On the estimation errors of KM and V from time-course  
32 experiments using the Michaelis-Menten equation. *Biophys Chem* **2016**, *219*, 17-27.
- 33 (77) Johnson, K. A., New standards for collecting and fitting steady state kinetic data.  
34 *Beilstein J Org Chem* **2019**, *15*, 16-29.
- 35 (78) Jahn, B.; Jonasson, N. S. W.; Hu, H.; Singer, H.; Pol, A.; Good, N. M.; den Camp, H.;  
36 Martinez-Gomez, N. C.; Daumann, L. J., Understanding the chemistry of the artificial electron  
37 acceptors PES, PMS, DCPIP and Wurster's Blue in methanol dehydrogenase assays. *J Biol Inorg*  
38 *Chem* **2020**, *25*, 199-212.
- 39 (79) Prince, R. C.; Linkletter, S. J.; Dutton, P. L., The thermodynamic properties of some  
40 commonly used oxidation-reduction mediators, inhibitors and dyes, as determined by  
41 polarography. *Biochim Biophys Acta* **1981**, *635*, 132-48.
- 42 (80) Peck, H. D., Jr.; Gest, H., Formic dehydrogenase and the hydrogenlyase enzyme complex  
43 in *coli-aerogenes* bacteria. *J Bacteriol* **1957**, *73*, 706-21.
- 44 (81) Weissgerber, T. L.; Winham, S. J.; Heinzen, E. P.; Milin-Lazovic, J. S.; Garcia-Valencia,  
45 O.; Bukumiric, Z.; Savic, M. D.; Garovic, V. D.; Milic, N. M., Reveal, Don't Conceal:  
46 Transforming Data Visualization to Improve Transparency. *Circulation* **2019**, *140*, 1506-1518.

- 1 (82) Xiang, D.; Magana, D.; Dyer, R. B., CO<sub>2</sub> reduction catalyzed by mercaptopteridine on  
2 glassy carbon. *J Am Chem Soc* **2014**, *136*, 14007-10.
- 3 (83) Merritt, M. E.; Harrison, C.; Storey, C.; Jeffrey, F. M.; Sherry, A. D.; Malloy, C. R.,  
4 Hyperpolarized <sup>13</sup>C allows a direct measure of flux through a single enzyme-catalyzed step by  
5 NMR. *Proc Natl Acad Sci U S A* **2007**, *104*, 19773-7.
- 6 (84) Niekus, H. G.; Stouthamer, A. H., Formate oxidase in glutaraldehyde-treated  
7 *Campylobacter sputorum* subspecies *bubulus*. *FEMS Microbiol Lett* **1981**, *11*, 83-87.
- 8 (85) Goodhew, C. F.; elKurdi, A. B.; Pettigrew, G. W., The microaerophilic respiration of  
9 *Campylobacter mucosalis*. *Biochim Biophys Acta* **1988**, *933*, 114-23.
- 10 (86) Miner, K. D.; Mukherjee, A.; Gao, Y. G.; Null, E. L.; Petrik, I. D.; Zhao, X.; Yeung, N.;  
11 Robinson, H.; Lu, Y., A designed functional metalloenzyme that reduces O<sub>2</sub> to H<sub>2</sub>O with over  
12 one thousand turnovers. *Angew Chem Int Ed Engl* **2012**, *51*, 5589-92.
- 13 (87) Kakeshpour, T.; Bax, A., NMR characterization of H<sub>2</sub>O<sub>2</sub> hydrogen exchange. *J Magn*  
14 *Reson* **2021**, *333*, 107092.
- 15 (88) Kalyanaraman, B.; Darley-USmar, V.; Davies, K. J.; Dennery, P. A.; Forman, H. J.;  
16 Grisham, M. B.; Mann, G. E.; Moore, K.; Roberts, L. J., 2nd; Ischiropoulos, H., Measuring  
17 reactive oxygen and nitrogen species with fluorescent probes: challenges and limitations. *Free*  
18 *Radic Biol Med* **2012**, *52*, 1-6.
- 19 (89) Wulff, P.; Day, C. C.; Sargent, F.; Armstrong, F. A., How oxygen reacts with oxygen-  
20 tolerant respiratory [NiFe]-hydrogenases. *Proc Natl Acad Sci U S A* **2014**, *111*, 6606-11.
- 21 (90) Zielonka, J.; Sikora, A.; Joseph, J.; Kalyanaraman, B., Peroxynitrite is the major species  
22 formed from different flux ratios of co-generated nitric oxide and superoxide: direct reaction  
23 with boronate-based fluorescent probe. *J Biol Chem* **2010**, *285*, 14210-6.
- 24 (91) Tarpey, M. M.; Fridovich, I., Methods of detection of vascular reactive species: nitric  
25 oxide, superoxide, hydrogen peroxide, and peroxynitrite. *Circ Res* **2001**, *89*, 224-36.
- 26 (92) Azzi, A.; Montecucco, C.; Richter, C., The use of acetylated ferricytochrome c for the  
27 detection of superoxide radicals produced in biological membranes. *Biochem Biophys Res*  
28 *Commun* **1975**, *65*, 597-603.
- 29 (93) Lu, Y.; Koo, J., O<sub>2</sub> sensitivity and H<sub>2</sub> production activity of hydrogenases-A review.  
30 *Biotechnol Bioeng* **2019**, *116*, 3124-3135.
- 31 (94) Shaw, R. W.; Rife, J. E.; O'Leary, M. H.; Beinert, H., Oxidation of reduced cytochrome c  
32 oxidase with <sup>18</sup>O<sub>2</sub>. A search for mu-oxo-bridged metal species in the oxidized enzyme. *J Biol*  
33 *Chem* **1981**, *256*, 1105-7.
- 34 (95) Lauterbach, L.; Lenz, O., Catalytic production of hydrogen peroxide and water by  
35 oxygen-tolerant [NiFe]-hydrogenase during H<sub>2</sub> cycling in the presence of O<sub>2</sub>. *J Am Chem Soc*  
36 **2013**, *135*, 17897-905.
- 37 (96) Peters, J. W.; Beratan, D. N.; Bothner, B.; Dyer, R. B.; Harwood, C. S.; Heiden, Z. M.;  
38 Hille, R.; Jones, A. K.; King, P. W.; Lu, Y.; Lubner, C. E.; Minter, S. D.; Mulder, D. W.;  
39 Raugei, S.; Schut, G. J.; Seefeldt, L. C.; Tokmina-Lukaszewska, M.; Zadvornyy, O. A.; Zhang,  
40 P.; Adams, M. W., A new era for electron bifurcation. *Curr Opin Chem Biol* **2018**, *47*, 32-38.
- 41 (97) Hoke, K. R.; Cobb, N.; Armstrong, F. A.; Hille, R., Electrochemical studies of arsenite  
42 oxidase: an unusual example of a highly cooperative two-electron molybdenum center.  
43 *Biochemistry* **2004**, *43*, 1667-74.
- 44 (98) Yuly, J. L.; Zhang, P.; Ru, X.; Terai, K.; Singh, N.; Beratan, D. N., Efficient and  
45 reversible electron bifurcation with either normal or inverted potentials at the bifurcating  
46 cofactor. *Chem* **2021**, *7*, 1-17.

- 1 (99) Nitschke, W.; Russell, M. J., Redox bifurcations: mechanisms and importance to life  
2 now, and at its origin: a widespread means of energy conversion in biology unfolds. *Bioessays*  
3 **2012**, *34*, 106-9.
- 4 (100) Chowdhury, N. P.; Kahnt, J.; Buckel, W., Reduction of ferredoxin or oxygen by flavin-  
5 based electron bifurcation in *Megasphaera elsdenii*. *FEBS J* **2015**, *282*, 3149-60.
- 6 (101) Jumper, J.; Evans, R.; Pritzel, A.; Green, T.; Figurnov, M.; Ronneberger, O.;  
7 Tunyasuvunakool, K.; Bates, R.; Zidek, A.; Potapenko, A.; Bridgland, A.; Meyer, C.; Kohl, S. A.  
8 A.; Ballard, A. J.; Cowie, A.; Romera-Paredes, B.; Nikolov, S.; Jain, R.; Adler, J.; Back, T.;  
9 Petersen, S.; Reiman, D.; Clancy, E.; Zielinski, M.; Steinegger, M.; Pacholska, M.; Berghammer,  
10 T.; Bodenstein, S.; Silver, D.; Vinyals, O.; Senior, A. W.; Kavukcuoglu, K.; Kohli, P.; Hassabis,  
11 D., Highly accurate protein structure prediction with AlphaFold. *Nature* **2021**, *596*, 583-589.
- 12 (102) Holm, L., Using Dali for Protein Structure Comparison. *Methods Mol Biol* **2020**, *2112*,  
13 29-42.
- 14 (103) Reich, H. J.; Hondal, R. J., Why Nature Chose Selenium. *ACS Chem Biol* **2016**, *11*, 821-  
15 41.
- 16 (104) Evans, R. M.; Krahn, N.; Murphy, B. J.; Lee, H.; Armstrong, F. A.; Soll, D., Selective  
17 cysteine-to-selenocysteine changes in a [NiFe]-hydrogenase confirm a special position for  
18 catalysis and oxygen tolerance. *Proc Natl Acad Sci U S A* **2021**, *118*.
- 19 (105) Nicolet, Y.; Fontecilla-Camps, J. C., Iron-sulfur clusters and molecular oxygen: function,  
20 adaptation, degradation, and repair. In *Iron-Sulfur Clusters in Chemistry and Biology*, Rouault,  
21 T. A., Ed. 2014; pp 359-385.
- 22 (106) Lu, Z.; Imlay, J. A., When anaerobes encounter oxygen: mechanisms of oxygen toxicity,  
23 tolerance and defence. *Nat Rev Microbiol* **2021**.
- 24 (107) Sen, A.; Imlay, J. A., How Microbes Defend Themselves From Incoming Hydrogen  
25 Peroxide. *Front Immunol* **2021**, *12*, 667343.
- 26 (108) Niekus, H. G.; Van Doorn, E.; De Vries, W.; Stouthamer, A. H., Aerobic growth of  
27 *Campylobacter sputorum* subspecies *bubulus* with formate. *J. Gen. Microbiol.* **1980**, *118*, 419-  
28 428.
- 29 (109) Ohta, H.; Gottschal, J. C., Formate oxidation by *Wolinella recta* ATCC 33238 with  
30 oxygen as electron acceptor. *FEMS Microbiol Lett* **1988**, *50*, 163-188.
- 31 (110) Hoffman, P. S.; Goodman, T. G., Respiratory physiology and energy conservation  
32 efficiency of *Campylobacter jejuni*. *J Bacteriol* **1982**, *150*, 319-26.
- 33 (111) Taylor, A. J.; Kelly, D. J., The function, biogenesis and regulation of the electron  
34 transport chains in *Campylobacter jejuni*: New insights into the bioenergetics of a major food-  
35 borne pathogen. *Adv Microb Physiol* **2019**, *74*, 239-329.
- 36 (112) Khademian, M.; Imlay, J. A., *Escherichia coli* cytochrome c peroxidase is a respiratory  
37 oxidase that enables the use of hydrogen peroxide as a terminal electron acceptor. *Proc Natl*  
38 *Acad Sci U S A* **2017**, *114*, E6922-E6931.
- 39 (113) Nishikawa, K.; Ogata, H.; Higuchi, Y., Structural basis of the function of [NiFe]-  
40 hydrogenases. *Chem Lett* **2020**, *49*, 164-173.
- 41 (114) Noor, N. D. M.; Matsuura, H.; Nishikawa, K.; Tai, H.; Hirota, S.; Kim, J.; Kang, J.;  
42 Tateno, M.; Yoon, K. S.; Ogo, S.; Kubota, S.; Shomura, Y.; Higuchi, Y., Redox-dependent  
43 conformational changes of a proximal [4Fe-4S] cluster in Hyb-type [NiFe]-hydrogenase to  
44 protect the active site from O<sub>2</sub>. *Chem Commun (Camb)* **2018**, *54*, 12385-12388.

- 1 (115) Sakai, K.; Kitazumi, Y.; Shirai, O.; Takagi, K.; Kano, K., High-Power Formate/Dioxygen  
2 Biofuel Cell Based on Mediated Electron Transfer Type Bioelectrocatalysis. *ACS Catalysis*  
3 **2017**, *7*, 5668-5673.
- 4 (116) Meneghello, M.; Leger, C.; Fourmond, V., Electrochemical Studies of CO<sub>2</sub> -Reducing  
5 Metalloenzymes. *Chemistry* **2021**, *27*, 17542-17553.
- 6 (117) Ruth, J. C.; Spormann, A. M., Enzyme electrochemistry for industrial applications - A  
7 perspective on future area of focus. *ACS Catal* **2021**, *11*, 5951-5967.
- 8 (118) Cracknell, J. A.; Vincent, K. A.; Ludwig, M.; Lenz, O.; Friedrich, B.; Armstrong, F. A.,  
9 Enzymatic oxidation of H<sub>2</sub> in atmospheric O<sub>2</sub>: the electrochemistry of energy generation from  
10 trace H<sub>2</sub> by aerobic microorganisms. *J Am Chem Soc* **2008**, *130*, 424-5.
- 11 (119) Vincent, K. A.; Cracknell, J. A.; Lenz, O.; Zebger, I.; Friedrich, B.; Armstrong, F. A.,  
12 Electrocatalytic hydrogen oxidation by an enzyme at high carbon monoxide or oxygen levels.  
13 *Proc Natl Acad Sci U S A* **2005**, *102*, 16951-4.
- 14 (120) Vincent, K. A.; Cracknell, J. A.; Clark, J. R.; Ludwig, M.; Lenz, O.; Friedrich, B.;  
15 Armstrong, F. A., Electricity from low-level H<sub>2</sub> in still air--an ultimate test for an oxygen  
16 tolerant hydrogenase. *Chem Commun (Camb)* **2006**, 5033-5.
- 17 (121) Mulder, D. W.; Peters, J. W.; Raugei, S., Catalytic bias in oxidation-reduction catalysis.  
18 *Chem Commun (Camb)* **2021**, *57*, 713-720.
- 19 (122) Fourmond, V.; Leger, C.; Plumere, N., Reversible catalysis. *Nat Rev Chem* **2021**, *5*, 348-  
20 360.
- 21 (123) Shafaat, H. S.; Yang, J. Y., Uniting biological and chemical strategies for selective CO<sub>2</sub>  
22 reduction. *Nat Catal* **2021**, *4*, 928-939.
- 23 (124) Magalon, A.; Alberge, F., Distribution and dynamics of OXPHOS complexes in the  
24 bacterial cytoplasmic membrane. *Biochim Biophys Acta* **2016**, *1857*, 198-213.
- 25 (125) Hillesland, K. L.; Lim, S.; Flowers, J. J.; Turkarslan, S.; Pinel, N.; Zane, G. M.; Elliott,  
26 N.; Qin, Y.; Wu, L.; Baliga, N. S.; Zhou, J.; Wall, J. D.; Stahl, D. A., Erosion of functional  
27 independence early in the evolution of a microbial mutualism. *Proc Natl Acad Sci U S A* **2014**,  
28 *111*, 14822-7.
- 29 (126) Keller, K. L.; Bender, K. S.; Wall, J. D., Development of a markerless genetic exchange  
30 system for *Desulfovibrio vulgaris* Hildenborough and its use in generating a strain with increased  
31 transformation efficiency. *Appl Environ Microbiol* **2009**, *75*, 7682-91.
- 32 (127) Li, M. Z.; Elledge, S. J., Harnessing homologous recombination in vitro to generate  
33 recombinant DNA via SLIC. *Nat Methods* **2007**, *4*, 251-6.
- 34 (128) Zane, G. M.; Yen, H. C.; Wall, J. D., Effect of the deletion of qmoABC and the  
35 promoter-distal gene encoding a hypothetical protein on sulfate reduction in *Desulfovibrio*  
36 *vulgaris* Hildenborough. *Appl Environ Microbiol* **2010**, *76*, 5500-9.
- 37 (129) Studier, F. W., Protein production by auto-induction in high density shaking cultures.  
38 *Protein Expr Purif* **2005**, *41*, 207-34.
- 39 (130) Jones, R. W.; Garland, P. B., Sites and specificity of the reaction of bipyridylum  
40 compounds with anaerobic respiratory enzymes of *Escherichia coli*. Effects of permeability  
41 barriers imposed by the cytoplasmic membrane. *Biochem J* **1977**, *164*, 199-211.
- 42 (131) Axley, M. J.; Grahame, D. A., Kinetics for formate dehydrogenase of *Escherichia coli*  
43 formate-hydrogenlyase. *J Biol Chem* **1991**, *266*, 13731-6.
- 44 (132) Ghosh, R.; Quayle, J. R., Phenazine ethosulfate as a preferred electron acceptor to  
45 phenazine methosulfate in dye-linked enzyme assays. *Anal Biochem* **1979**, *99*, 112-7.

- 1 (133) Jahn, B.; Pol, A.; Lumpe, H.; Barends, T. R. M.; Dietl, A.; Hogendoorn, C.; Op den  
2 Camp, H. J. M.; Daumann, L. J., Similar but Not the Same: First Kinetic and Structural Analyses  
3 of a Methanol Dehydrogenase Containing a Europium Ion in the Active Site. *Chembiochem*  
4 **2018**.
- 5 (134) Olp, M. D.; Kalous, K. S.; Smith, B. C., ICEKAT: an interactive online tool for  
6 calculating initial rates from continuous enzyme kinetic traces. *BMC Bioinformatics* **2020**, *21*,  
7 186.
- 8 (135) Stoll, S.; Schweiger, A., EasySpin, a comprehensive software package for spectral  
9 simulation and analysis in EPR. *J Magn Reson* **2006**, *178*, 42-55.
- 10 (136) Brautigan, D. L.; Ferguson-Miller, S.; Margoliash, E., Mitochondrial cytochrome c:  
11 preparation and activity of native and chemically modified cytochromes c. *Methods Enzymol*  
12 **1978**, *53*, 128-64.

13

## OutFOXing Oxygen via Redox Bifurcation

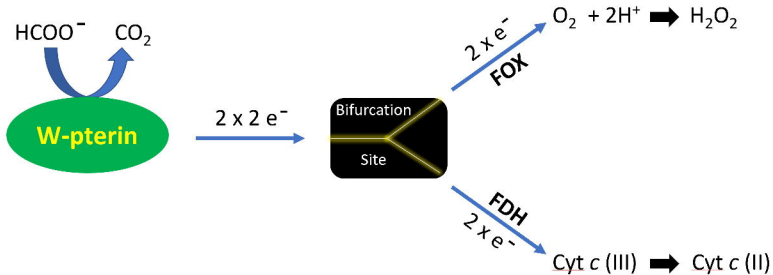

Source: https://www.biorxiv.org/content/10.1101/2022.01.18.476765.full.pdf
